# 1 Separable roles for RanGTP in nuclear and 2 ciliary trafficking of a kinesin-2 subunit

3 Shengping Huang <sup>2\*</sup> and Prachee Avasthi <sup>1,2\*</sup>

4  
5 <sup>1</sup> Anatomy and Cell Biology, University of Kansas Medical Center, Kansas City, KS; <sup>2</sup> Ophthalmology,  
6 University of Kansas Medical Center, Kansas City, KS. \*Addresses for correspondence: Shengping  
7 Huang (E-mail address: [sphalan@gmail.com](mailto:sphalan@gmail.com)); Prachee Avasthi (Email address: [pavasthi@kumc.edu](mailto:pavasthi@kumc.edu))  
8

## 9 **Abstract**

10 Kinesin is part of the microtubule (MT)-binding motor protein superfamily, which exerts crucial  
11 functions in cell division and intracellular transport in different organelles. The heterotrimeric  
12 kinesin-2, consisting of the kinesin like protein KIF3A/3B heterodimer and kinesin-associated  
13 protein KAP3, is highly conserved across species from the green alga *Chlamydomonas* to  
14 humans. It plays diverse roles in cargo transport including anterograde (base to tip) trafficking in  
15 cilium. However, the molecular determinants mediating trafficking of heterotrimeric kinesin-2  
16 itself is poorly understood. Using the unicellular eukaryote *Chlamydomonas* and mammalian  
17 cells, we show that RanGTP regulates ciliary trafficking of KAP3. We found the armadillo repeat  
18 region 6-9 (ARM6-9) of KAP3, required for its nuclear translocation, is sufficient for its targeting  
19 to the ciliary base. Given that KAP3 is essential for cilia formation and the emerging roles of  
20 RanGTP/importin  $\beta$  in ciliary protein targeting, we further investigate the effect of RanGTP in  
21 cilium length regulation in these two different systems. We demonstrate that precise control of  
22 RanGTP levels, revealed by different Ran mutants, is crucial for cilium formation and  
23 maintenance. Most importantly, we were able to segregate RanGTP regulation of ciliary protein  
24 incorporation from of its nuclear roles. Our work provides important support for the model that  
25 nuclear import mechanisms have been coopted for independent roles in ciliary import.  
26

27 **Key words:** RanGTP, Kinesin-2, KAP3, nuclear import, ciliary targeting  
28  
29

## 30 **Introduction**

31 Cilia are microtubule-based protrusions with sensory and/or motile functions. In mammals,  
32 defects in assembly and maintenance of cilia results in a series of diseases called “ciliopathies”

33 (Fliegau et al., 2007; Mitchison et al., 2017; Anvarian et al., 2019; Breslow et al., 2019). The  
34 assembly and maintenance of these organelles are dependent on anterograde and retrograde  
35 intraflagellar transport (IFT) (Rosenbaum et al., 2002). Anterograde IFT, which moves from the  
36 base of a cilium to the tip, is driven by kinesin-2 (Kozminski et al., 1995; Cole et al., 1998),  
37 whereas retrograde IFT, which moves from the tip back to the base, is achieved by cytoplasmic  
38 dynein 1b (Signor et al., 1999; Pazour et al., 1999; Porter et al., 1999). The kinesin-2 motor  
39 family is composed of a heterotrimeric KIF3A/KIF3B/KAP3 motor and a homodimeric KIF17  
40 motor (Hirokawa et al. 2009). Unlike homodimeric KIF17, heterotrimeric kinesin-2 is highly  
41 conserved, and loss of function in any component of heterotrimeric kinesin-2 results in defective  
42 cilia in different organisms (Walther et al., 1994; Morris et al., 1997; Sarpal et al., 2004; Zhao et  
43 al., 2011). In addition to cilium formation, regulation and maintenance of cilium length is also  
44 dependent on the size and frequency of kinesin-2 trains recruited to/entering cilia (Ludington et  
45 al., 2013; Engel et al., 2009). In addition to its central role in IFT and ciliogenesis, heterotrimeric  
46 kinesin-2 has also been reported in other organelle transport events outside cilia. This includes  
47 anterograde transport from endoplasmic reticulum to the Golgi apparatus in *Xenopus* (Le Bot et  
48 al., 1998), retrograde transport from the Golgi to endoplasmic reticulum in HeLa cells (Stauber  
49 et al., 2006), and establishment of cell polarity during migration (Murawala et al., 2009).  
50 Furthermore, heterotrimeric kinesin-2 is reported to play critical roles in mitosis (Fan et al., 2004;  
51 Haraguchi et al., 2006).

52  
53 Cilia assemble in quiescent cells and disassemble in dividing cells (Plotnikova et al., 2009).  
54 In quiescent cells, heterotrimeric kinesin-2 is localized in both cilia and basal body in ciliated  
55 cells. In dividing cells, when cells enter mitosis and cilia retract, the non-motor subunit KAP3 is  
56 transported into nucleus before nuclear membrane break down in cells of sea urchin blastulae  
57 (Morris et al., 2004). During cytokinesis, the motor protein KIF3B is localized in the midbody  
58 (Fan et al., 2004). Macromolecules can't freely go into or out of the cilium and nucleus because  
59 diffusion barriers exist at the ciliary base and the nuclear pore complex (NPC) (Kee et al., 2012;  
60 Breslow et al., 2013; Takao et al. 2014., Endicott et al., 2018). The fundamental question is how  
61 this conserved heterotrimeric kinesin-2 complex traffics between different compartments (the  
62 cytoplasm, nucleus and cilium) for specific functions, and how these processes are regulated.

63  
64 For nuclear transport from the cytoplasm, the NPC mediates active transport of proteins  
65 (Alber et al., 2007; Wenthe SR et al., 2010; Strambio-De-Castillia et al., 2010; Beck et al., 2017 ).  
66 Larger proteins (>50 kDa) generally require RanGTP and specific importin transport receptors to

67 cross the NPC (Gorlich et al., 1994; Gorlich and vogel et al., 1995). Importins usually bind a  
68 nuclear localization signal (NLS)-containing cargo at relatively low RanGTP level in cytosol. This  
69 moves the complex through NPCs and releases cargo in the nucleus where RanGTP  
70 concentration is high (Moore et al., 1993; Gorlich et al., 1999). In most cases, importin  $\beta$  binds  
71 to importin  $\alpha$ , which interacts with a conventional NLS, to mediate substrate nuclear import  
72 (Gorlich and Kostka et al., 1995). In contrast, importin  $\beta$  recognizes non-traditional proline-  
73 tyrosine NLS (PY-NLS) for nuclear import (Lee et al., 2006). In the nucleus, direct binding of  
74 RanGTP with importin  $\beta$  results in cargo release (Gorlich et al., 1997).

75  
76 Compared to nucleo-cytoplasmic transport, the molecular mechanisms or sequence motifs  
77 controlling membrane or soluble protein trafficking into cilia are less well understood. Previous  
78 studies reported that several cis-acting elements, including RVxP, VxPx, and Ax[S/A]xQ motifs,  
79 are important for mediating ciliary trafficking of membrane proteins (Jenkins et al., 2006; Geng  
80 et al., 2006; Mazelova et al., 2009; Berbari et al., 2008). Several recent studies implicated that  
81 the cilium and nucleus are co-evolved for signal integration because of the shared components  
82 and evolutionary origin (McClure-Begley et al., 2017; Johnson et al., 2019; Satir et al., 2019). It  
83 was also proposed that there are some shared mechanisms between ciliary import and nuclear  
84 import (Dishinger et al., 2010; Takao et al., 2014; Del Viso et al., 2016; Takao et al., 2017;  
85 Endicott et al., 2018). Several results indicated that RanGTP/importin  $\beta$ /NLS import system is  
86 required for ciliary targeting of either membrane or soluble proteins including importin  $\beta$ 1 for  
87 Crumbs3 (Fan et al., 2007), RanGTP/importin  $\beta$ 2 for KIF17 and Gli2 (Tarrado et al., 2016;  
88 Dishinger et al., 2010), importin  $\beta$ 2 for RP2 (Hurd et al., 2011), importin  $\alpha$ 1/ $\alpha$ 6/NLS for KIF17  
89 (Funabashi et al., 2017), and importin  $\beta$ 2/PY-NLS for GLI2/GLI3 (Han et al., 2017). It was also  
90 reported that importin  $\beta$ 2/Rab8 forms a ternary complex with ciliary localization sequences to  
91 direct membrane protein trafficking to cilia (Madugula et al., 2016), suggesting that this process  
92 is independent of RanGTP and a NLS or PY-NLS. Despite these advancements in uncovering  
93 mechanisms for ciliary import, it remains unclear whether RanGTP regulates ciliary trafficking  
94 directly or by affecting nuclear import to result in defective ciliary trafficking. It is also unclear  
95 whether different cargoes depend on different importin  $\beta$  receptors for ciliary trafficking. Lastly,  
96 prior work investigated determinants of ciliary entry for the homodimeric ciliary kinesin  
97 composed of KIF17 (Dishinger et al., 2010), the heterotrimeric kinesin-2 is the motor that  
98 dictates cilium assembly and maintenance (Walther et al., 1994; Morris et al., 1997; Sarpal et  
99 al., 2004; Zhao et al., 2011; Engel et al., 2009; Ludington et al., 2013). Therefore, we focused  
100 on how ciliary trafficking of the heterotrimeric kinesin-2 is regulated by leveraging the unique

101 advantages of the unicellular green alga *Chlamydomonas reinhardtii* as an excellent eukaryotic  
102 model to study ciliogenesis (Harris et al., 2001; Rosenbaum et al., 2002).

103

104 Cilia of *Chlamydomonas* can be regenerated to full length in two hours, and unlike  
105 mammalian cells, ciliary assembly does not need to be induced (Rosenbaum et al., 1969) to  
106 result in heterogeneous population of ciliated and non-ciliated cells. The molecular mechanism  
107 of the nucleo-cytoplasmic trafficking is likely conserved between the *Chlamydomonas* and  
108 humans (Li et al., 2018). However, there are fewer constituent nucleoporins in the  
109 *Chlamydomonas* NPC compared to that of humans (Neumann et al., 2006). By using both  
110 mammalian and *Chlamydomonas* cells, we have found that ciliary trafficking of kinesin  
111 associated protein KAP3 is regulated by RanGTP. We demonstrated that precise manipulation  
112 of RanGTP level is crucial for regulating cilium formation. Importantly, we were able to clearly  
113 show that RanGTP plays a direct role in incorporation of ciliary proteins that is independent of  
114 its nuclear roles. These results provide potential insights for the molecular mechanism  
115 orchestrating multi-compartment trafficking of the heterotrimeric kinesin-2 motor complex.  
116 Further, they answer a long-standing open question in the field about whether nuclear import  
117 mechanisms have been coopted for direct ciliary import.

118

## 119 **Results**

### 120 **Ciliary protein KAP3 can localize to the nucleus**

121 The heterotrimeric kinesin-2 motor complex consists of the heterodimeric motor proteins  
122 KIF3A/3B and the adaptor protein KAP3. In contrast, the homodimeric kinesin-2 KIF17 motor  
123 does not need an adaptor protein to exert its function. Although it was suggested that KAP3  
124 functions as a linker between KIF3A/3B and the specific cargoes to facilitate intracellular  
125 transport, the function of KAP3 is still not well characterized. To explore this, we firstly  
126 investigated the intracellular localization of KAP3 in ciliated and non-ciliated cells. HA-tagged  
127 KAP3A and KAP3B (a short isoform of KAP3A) were transfected into hTERT-RPE cells. 24  
128 hours after transfection, cilia were induced by serum starvation. As expected, both HA-tagged  
129 KAP3A and KAP3B co-localized with acetylated- $\alpha$ -tubulin, confirming the intracellular  
130 localization of KAP3A and KAP3B are not affected by small HA epitope and can be targeted to  
131 cilia (**Figure 1A**). Surprisingly, we noticed that a significant amount of KAP3A and KAP3B was  
132 also distributed throughout the nucleus (**Figure 1A**). We further examined the localization of  
133 KAP3A and KAP3B in other different cell types. As shown in **Figure 1B**, HA-tagged KAP3A and  
134 KAP3B are mainly localized in the nucleus of COS-7 cells, although a small amount is

135 distributed in the cytoplasm. We also showed that EGFP-tagged KAP3A and KAP3B could  
136 localize in the nucleus of MDCK cells (**Figure 1C**). Nuclear localization of KAP3A was  
137 consistent with that of EGFP tagged KAP3A in a previous report (Tenny et al., 2016).

138 To dissect critical regions within KAP3A responsible for its nuclear localization, as depicted  
139 in **Figure 1D**, EGFP-fused KAP3 truncations were constructed (henceforth, KAP3 refers to the  
140 long isoform KAP3A). First, the expression of appropriately-sized truncations in MDCK cells was  
141 detected by western blot analysis (**Figure 1E**). Second, the subcellular distributions of these  
142 KAP3 truncations in MDCK cells were analyzed via fluorescence microscopy. As shown in  
143 **Figure 1F**, the N-terminal fragment KAP3 (1-270) and the C-terminal fragment KAP3 (661-792)  
144 are distributed in both the cytoplasm and nucleus, and KAP3 (271-460) was exclusively  
145 distributed in the cytoplasm. In contrast, KAP3 (461-660), consisting of armadillo repeats (ARM)  
146 6-9, were predominantly localized in the nucleus, which is similar to full-length KAP3. These  
147 data indicate that the region between amino acids 461 and 660 is crucial for nuclear localization  
148 of KAP3. Taken together, our data demonstrate that ciliary protein KAP3 can localize to the  
149 nucleus under the control of armadillo repeats 6-9.

150

### 151 **RanGTP, but not importin $\beta$ 2, mediates nuclear translocation of KAP3**

152 As shown in **Figure 1**, KAP3 is distributed to the nucleus in different cells. To determine the  
153 molecular mechanism of KAP3 nuclear translocation, we tested a well-studied pathway for  
154 protein nuclear import, RanGTP mediated nuclear import, which requires a high concentration of  
155 RanGTP in the nucleus for the disassembly of the imported complexes. To determine whether  
156 RanGTP drives nuclear import of KAP3, the dominant negative mutant RanQ69L which cannot  
157 hydrolyze GTP, was used in this study. As shown in **Figure 2A**, Ectopic expression of RanQ69L  
158 blocked nuclear localization of KAP3 in COS-7 cells, resulting in a more cytoplasmic distribution  
159 of KAP3 relative to wild-type controls. This data suggests that nuclear translocation of KAP3 is  
160 mediated by a RanGTP-dependent nuclear import pathway.

161 We mapped the region responsible for nuclear localization of KAP3 and found that KAP3  
162 (461-660) is required. If the region we mapped is correct, the nuclear localization of this  
163 truncation KAP3 (461-660) should be RanGTP-dependent, which act the same way as full-  
164 length KAP3. To test this, we co-transfected KAP3 (461-660) with the dominant negative Ran  
165 mutant RanQ69L. As shown in **Figure 2B**, RanQ69L completely disrupted nuclear import of  
166 KAP3 (461-660) and resulted in the cytoplasmic localization of this truncation. These results  
167 suggest that RanGTP-dependent nuclear import of KAP3 is dependent on the 461-660 region of

168 KAP3. In contrast, RanQ69L didn't change the localization of other KAP3 truncations (**Figure**  
169 **2B**).

170 It was reported that the import receptor importin  $\beta$ 2 plays critical roles in both nuclear import  
171 and ciliary import of ciliary proteins, like KIF17 and GLI2/GLI3 (Dishinger et al., 2010; Han et al.,  
172 2017). We further examined whether importin  $\beta$ 2 is utilized for nuclear translocation of KAP3.  
173 The importin  $\beta$ 2 inhibitory peptide M9M was used in these studies (Cansizoglu et al., 2007).  
174 hnRNP A1 was used as a positive control for this assay. As shown in **Figure S1A**, expression of  
175 MBP-tagged M9M inhibitory peptide disrupted nuclear localization of hnRNPA1 (*white arrow*),  
176 which confirmed that hnRNP A1 utilizes transport receptor importin  $\beta$ 2 for its nuclear  
177 translocation. Compared to the empty MBP control, MBP-tagged M9M did not block the nuclear  
178 translocation of KAP3 (**Figure S1B**). This data suggests nuclear import of KAP3 is independent  
179 of the importin  $\beta$ 2 receptor.

180

181 **The armadillo repeat domain 6-9 (ARM6-9) alone is sufficient for ciliary base localization.**

182 KAP3 can localize in both the cilium and nucleus. We dissected the regions required for  
183 nuclear translocation of KAP3. Next, we mapped the regions required for ciliary targeting of  
184 KAP3 in hTERT-RPE cells. As depicted in **Figure 3A**, full-length KAP3 contains three regions: a  
185 non-conserved N-terminal domain, nine armadillo repeats, and a C-terminal conserved domain  
186 (Jimbo et al., 2002; Shimuzu et al., 1996). Based on this, a series of truncations of KAP3 were  
187 generated and intracellular localization of these truncations was examined after cilium induction.  
188 As shown in **Figure 3B**, the truncation KAP3 (661-792) containing the C-terminal domain  
189 completely abolished localization to the cilium and ciliary base. In contrast, the truncation  
190 KAP3(186-792) containing both the nine armadillo repeats and C-terminal domain, and the  
191 truncation KAP3(186-660) merely with the nine armadillo repeats showed intense signal at the  
192 ciliary base. These data suggest that the nine armadillo repeats are required for KAP3 targeting  
193 to the ciliary base. We further narrowed the region within the nine armadillo repeats and  
194 demonstrated that the truncation KAP3(461-660), harboring the ARM6-9, is sufficient for ciliary  
195 base targeting of KAP3 (**Figure 3B**). It is noteworthy that this region is also required for  
196 RanGTP mediated KAP3 nuclear trafficking.

197

198 **RanGTP regulates percent ciliation in human retinal epithelial cells**

199 Given the middle region of KAP3, 461-660, is required for both nuclear and cilium base  
200 targeting and nuclear targeting is RanGTP dependent, we wanted to investigate whether KAP3-  
201 dependent ciliogenesis and cilium length regulation (Sarpal et al., 2003; Mueller et al., 2004),

202 was also RanGTP dependent. We were further interested in Ran-dependent ciliary phenotypes  
203 and KAP3 localization due to previously reported shared mechanisms between nuclear and  
204 ciliary import processes (Dishinger et al., 2010; Takao et al., 2014; Del Viso et al., 2016; Takao  
205 et al., 2017; Endicott et al., 2018) and conflicting conclusions about the effect of RanGTP on  
206 ciliogenesis (Dishinger et al., 2010; Fan et al., 2011; Torrado et al., 2016). Wild-type Ran and  
207 three well-characterized dominant negative Ran mutants (RanQ69L, RanG19V and RanT24N)  
208 were used in this study. First, we studied the intracellular localization of these proteins in  
209 hTERT-RPE cells in serum-starved condition which induce ciliogenesis. As shown in **Figure S2**,  
210 all the mutants are predominantly localized in the nucleus which is similar to that of wild-type  
211 Ran. These data indicate that expression of these point mutants did not dramatically affect  
212 intracellular localization of Ran. To analyze the role of these mutants in cilium formation and  
213 length regulation in hTERT-RPE cells, wild type and mutant Ran expression plasmids were  
214 transfected into hTERT-RPE cells. 24 hours post-transfection, low serum media were added for  
215 24 hours to induce cilium formation. As shown in **Figure 4A and 4C**, ectopic expression of  
216 either the GTP locked mutants RanQ69L/RanG19V or the GDP-locked mutant RanT24N had no  
217 obvious effect on cilium length. In contrast, cells transfected with these dominant negative  
218 mutants could reduce ciliation percentage compared the un-transfected control cells (**Figure**  
219 **4B**). Further, different Ran mutants had different effects on ciliation percentage. RanQ69L has  
220 higher affinity to GTP and resulted in a dramatically reduction in ciliation percentage compared  
221 to RanG19V, which has relatively low affinity to GTP (Lounsbury et al., 1996) (**Figure 4B**).  
222 These data indicate that the RanGTP level in hTERT-RPE cells is a determinant of initiation of  
223 cilium formation. Taken together, the ability to bind and hydrolyze GTP by Ran in vivo, revealed  
224 by different dominant Ran mutants, regulates its essential functions on the generation of cilia.

225 To determine why there is reduced cilium formation in RanQ69L-expressing RPE cells, we  
226 further investigated the localization of other important components, like the IFT complex and  
227 kinesin-2. As shown in **Figure 4D**, IFT81, a component of the IFT-B complex, is still localized in  
228 the ciliary base of hTERT-RPE cells expressing RanQ69L, suggesting that IFT-B targeting is not  
229 affected and is unlikely to be the primary cause of defective cilium formation. In contrast, the  
230 kinesin-2 associated protein KAP3 didn't localize to the ciliary base. This data suggests that, in  
231 addition to potential roles for RanGTP in ciliary entry, ciliary targeting of the heterotrimeric  
232 kinesin-2 is also RanGTP-dependent.

233

234 **RanGTP regulates ciliary length and ciliary trafficking of KAP under steady-state**  
235 **conditions in *Chlamydomonas***

236 To see if mechanisms of Ran-dependent ciliary targeting and entry are broadly conserved,  
237 we tested the effect of Ran manipulation on assembly and kinesin-2 motor targeting in  
238 *Chlamydomonas* cilia. The unicellular green algae *Chlamydomonas* is an excellent model to  
239 study ciliary length regulation and protein trafficking. In addition to the extensive body of  
240 literature on motor trafficking and ciliary assembly in this organism, the small G-protein Ran and  
241 key residues required for GTP hydrolysis are well conserved between humans and  
242 *Chlamydomonas* (**Figure S3**). We therefore examined the role of Ran-like protein (Ran1), the  
243 ortholog of human Ran, on ciliary length regulation in wild-type *Chlamydomonas* CC-125 cells.  
244 Importazole (IPZ), a small molecular inhibitor which specifically blocks RanGTP-importin  $\beta$ 1  
245 interaction (Soderholm et al., 2011), was used to perturb RanGTP function. The result indicated  
246 treatment CC-125 cells with IPZ for 2 hours shortens ciliary length in a dose-dependent manner  
247 (**Figure 5, A and B**).

248 To exclude that the phenotype was caused by the off-target effect of the inhibitor, the GTP-  
249 locked Ran1 mutant Ran1Q73L, corresponding to human RanQ69L, was transformed into  
250 *Chlamydomonas*. As shown in **Figure 5C**, there is strong Ran1Q73L expression as expected in  
251 *Chlamydomonas* (green arrow), despite a portion of expressed Ble-2A-Ran1Q73L fusion  
252 proteins being incompletely processed due to the cleavage efficiency of 2A peptide in  
253 *Chlamydomonas* (red arrow). Compared to control cells with normal ciliary length and cell  
254 division, the cells expressing high levels of Ran1Q73L exhibits either clumpy cells or shortened  
255 ciliary length. One possible explanation for clumpy cells may be that there are no cilia to secrete  
256 ectosomes containing lytic enzyme to break the cell wall after cell division (Wood et al., 2013).  
257 These results demonstrated that RanGTP plays pivotal roles in ciliary length regulation in  
258 *Chlamydomonas*.

259 We showed that KAP3, but not IFT81, couldn't be targeted to ciliary base in hTERT-RPE  
260 cells constitutively expressing GTP-locked RanQ69L. It was reported that RanGTP regulates  
261 ciliary entry of the other motor KIF17, which is localized in the nucleus as KAP3 (Dishinger et  
262 al., 2010). Based on these data, we tested whether perturbing Ran function affected ciliary  
263 targeting or entry of KAP, the ortholog of human KAP3, in the *Chlamydomonas* KAP-GFP  
264 reporter strain CC-4296. As shown in **Figure 5D**, KAP-GFP is distributed in both the cilium and  
265 cilium base in control cells treated with DMSO. In contrast, ciliary localization of KAP-GFP was  
266 dramatically decreased in the cells treated with 20  $\mu$ M IPZ for 2 hours. These results indicate  
267 that ciliary localization of KAP is regulated by RanGTP in *Chlamydomonas*. To further  
268 investigate whether IPZ directly affects ciliary entry of KAP, we used real-time total internal  
269 reflection fluorescence microscopy (TIRFM) to study the dynamic behavior of KAP. Kymograph



270 analysis showed that KAP could enter into the cilium in un-treated cells. In contrast, ciliary entry  
271 of KAP is blocked in the cells treated with 50  $\mu$ M IPZ (**Figure 5E**). The image shown was taken  
272 around 20 minutes after addition of IPZ indicating a direct role of RanGTP in regulation of ciliary  
273 entry of the motor subunit KAP as propagation of nuclear effects are likely to take longer than  
274 the immediate reduction in ciliary entry upon drug addition.

275

## 276 **RanGTP directly regulates ciliary protein incorporation during cilia regeneration in** 277 ***Chlamydomonas***

278 One advantage of the *Chlamydomonas* model system in this context is the significant  
279 available information about requirements for nuclear regulation of ciliary assembly. During ciliary  
280 regeneration after ciliary severing (deciliation), new ciliary proteins need to be synthesized and  
281 transported to assembly sites for incorporation into cilia (**Figure 6A**). This process requires  
282 initiating gene expression, which would be dependent on nuclear import of specific transcription  
283 factors like XAP5 (Li et al., 2018). Therefore, it is possible that RanGTP regulates cilium length  
284 by indirectly affecting nuclear import and ultimately new transcription/ciliary protein synthesis.  
285 To tease apart nuclear and non-nuclear effects, we were able to use the small molecular  
286 inhibitor cycloheximide (CHX) to inhibit new protein synthesis during cilia regeneration. As  
287 shown in Figure 6A, in wild-type *Chlamydomonas* cells, this typically results in growth of cilia to  
288 half-length (6  $\mu$ m) which exhibits the ability of these cells to incorporate already-synthesized  
289 proteins to generate half-length cilia without the production of new proteins from the burst of  
290 transcription post-deciliation (Rosenbaum et al., 1969). As expected, when blocking new protein  
291 synthesis with CHX, the existing ciliary proteins can build short cilia as shown in **Figure 6B**. If  
292 RanGTP exclusively inhibits nuclear import, but not ciliary import, inhibition of Ran function  
293 should allow existing ciliary proteins to still incorporate and assemble cilia to half-length (**Figure**  
294 **6A, Model 1**). If inhibiting Ran function blocks both nuclear import and direct ciliary import, even  
295 the existing ciliary proteins shouldn't incorporate and build cilia, resulting in bald cells (**Figure**  
296 **6A, Model 2**). Our data fit Model 2 and show that when the deciliated cells are treated with IPZ  
297 to inhibit Ran function (with CHX to block any new protein synthesis), there is no cilium  
298 formation during regeneration. This demonstrates that IPZ can directly block incorporation of the  
299 existing ciliary proteins into cilia for assembly (**Figure 6B**). To confirm that the lack of ciliary  
300 growth wasn't due to cell toxicity and that IPZ only impacts the ability of existing proteins to  
301 enter cilia, we washed out IPZ but still continued CHX treatment to inhibit new protein synthesis.  
302 As shown in **Figure 6 C and D**, ciliary biogenesis is restored upon IPZ washout. These data  
303 clearly showed that under conditions where only existing ciliary proteins can either enter cilia or

304 not, RanGTP has direct effects in regulating ciliary protein incorporation. We also released CHX  
305 inhibition to confirm that, regardless of the presence of new proteins, blocking Ran function can  
306 regulate incorporation of existing ciliary proteins expected to enter cilia upon deciliation (**Figure**  
307 **S4 A and B**). Our data indicated IPZ can block incorporation of the existing ciliary proteins in  
308 addition to any newly synthesized proteins. In these conditions, if IPZ blocked nuclear entry of  
309 transcription factors needed for the spike in ciliary proteins but did not directly affect ciliary entry  
310 of existing proteins, cilia would still reach half-length from the already-synthesized ciliary protein  
311 pool. Ultimately, given the dual role of RanGTP in mediating ciliary import and nuclear import, it  
312 is important to segregate nuclear and direct ciliary effects of Ran perturbation. Here we are able  
313 to show that in spite of its demonstrated roles in regulating nuclear protein import, RanGTP has  
314 direct roles in mediating ciliary protein incorporation for cilia formation.

315

## 316 **Discussion**

317 Although most kinesin motors are localized in the cytoplasm, different conditions allow  
318 some kinesin motors to transport into the nucleus including KAP3, KIF4, KIF17, and KIF17B  
319 (Morris et al., 2004; Seungoh et al., 2001; Dishinger et al., 2010; Macho et al., 2002). KAP3 and  
320 KIF4 can redistribute to the nucleus during mitosis (Morris et al., 2004; Seungoh et al., 2001).  
321 During mouse spermatid development, KIF17B shuttles from nucleus to cytoplasm (Macho et  
322 al., 2002). We observed that both the isoforms of the heterotrimeric kinesin-2 accessory subunit  
323 KAP3A and KAP3B are localized in the nucleus, and that their nuclear localization is RanGTP  
324 dependent. Considering KIF17B can function as a transcription regulator (Macho et al., 2002), it  
325 is possible that KAP3 participates in regulation of gene expression in the nucleus. Besides the  
326 kinesin motors, many cilia associate proteins can localize in the nucleus (McClure-Begley et al.,  
327 2017). The exchange of components between the ciliary and nuclear compartments is also  
328 thought to be mediated by membrane-less organelles (Johnson et al., 2019). However, the  
329 nuclear roles and origin of cilia associated proteins needs to be further investigated.

330 It was reported that the armadillo repeats of KAP3 are responsible for binding to motor  
331 subunits KIF3A/3B, and the C-terminal conserved domain is responsible for specific cargo  
332 binding (Haraguci et al., 2005; Nagata et al., 1998; Jimbo et al., 2002; Deacon et al, 2003). Our  
333 data showed the armadillo repeats 6-9 (ARM6-9) is required for KAP3 targeting to the ciliary  
334 base, probably mediated by RanGTP. It is possible that the heterodimeric KIF3A/3B and  
335 RanGTP collaboratively regulate KAP3 targeting to the ciliary base. It is also noteworthy that  
336 cells expressing the truncated KAP3A (186-660), containing only the armadillo repeat domain,  
337 have normal cilia length, whereas cells expressing the truncated KAP3 (186-792), containing

338 both the armadillo repeats and cargo-binding domains, have no cilia. Given that loss of the  
339 cargo-binding domain dramatically decreases KAP3 binding to KIF3A/3B (Haraguci et al.,  
340 2005), our data suggest that the dominant negative function of KAP3 truncations is dependent  
341 upon their binding ability to the KIF3A/KIF3B motor subunits.

342 Several lines of evidence suggest that RanGTP is involved in ciliary protein trafficking  
343 (Dishinger et al., 2010; Hurd et al., 2001; Fan et al., 2011; Maiuri et al., 2013). RanGTP was  
344 reported to regulate ciliary entry of the homodimeric motor KIF17 and RP2 (Dishinger et al.,  
345 2010; Hurd et al., 2001). RanGTP was also reported to facilitate ciliary export of huntingtin  
346 (Maiuri et al., 2013). However, there role of RanGTP on cilium formation was ambiguous. Two  
347 groups demonstrated that RanGTP has no effect on ciliary biogenesis (Dishinger et al., 2010;  
348 Torrado et al., 2016), whereas another group showed that manipulation of RanGTP  
349 concentration via RanBP1 knockdown could drive cilia formation (Fan et al., 2011). The  
350 difference of these observations for the role of RanGTP on cilia formation may be due to  
351 different cell lines, different strategies for inhibiting RanGTP function, or the timing and levels of  
352 RanGTP inhibition relative to cilia induction. Our results indicate that different dominant negative  
353 forms of Ran have different effects on cilia formation, although these mutants have no effect on  
354 regulating cilium length. Furthermore, GTP locked mutant RanQ69L more dramatically affects  
355 percent ciliation than that of RanG19V. The difference between RanQ69L and RanG19V is that  
356 RanQ69L has much higher affinity for GTP than RanG19V, thus RanQ69L-expressing cells  
357 have less free RanGTP than RanG19V-expressing cells. Taken together, our results suggest  
358 that precise manipulation of intracellular free RanGTP is critical for regulating cilium formation.

359 In addition to RanGTP, the importin transport receptors also participate in ciliary protein  
360 trafficking (Fan et al., 2007; Dishinger et al., 2010; Hurd et al., 2001; Torrado et al., 2016;  
361 Madugula et al., 2016; Han et al., 2017). There is also some disagreement about which importin  
362 is utilized for ciliary protein trafficking. Importin  $\beta$ 1 was responsible for transmembrane protein  
363 Crumbs3 ciliary trafficking (Fan et al., 2007), and importin  $\beta$ 2 was identified as the transport  
364 receptor for ciliary targeting of either transmembrane or soluble proteins like KIF17, Gli2 and  
365 Gli3 (Dishinger et al., 2010; Hurd et al., 2001; Madugula et al., 2016; Torrado et al., 2016; Han  
366 et al., 2017). However, additional data has shown that importin  $\alpha$ 1 and  $\alpha$ 6, but not importin  $\beta$ 2,  
367 are responsible for ciliary targeting of soluble KIF17 (Funabashi et al., 2017). In general,  
368 importin  $\beta$ 1, alone or in cooperation with importin  $\alpha$ , transports substrates with a conventional  
369 NLS (Lange et al., 2007), whereas importin  $\beta$ 2 transports substrates that contain the non-  
370 conventional PY-NLS (Lee et al., 2006). Consistent with this, ciliary targeting of the  
371 transcriptional factor Gli2/Gli3, which utilizes transport receptor importin  $\beta$ 2, relies on its PY-NLS

372 motif. PY-NLS mutations also result in the loss of Gli2/Gli3 ciliary targeting (Han et al., 2017). It  
373 is reported that the NLS-like sequence in the C-terminal region of KIF17 is required for its ciliary  
374 targeting (Dishinger et al., 2010). This NLS-like sequence was further confirmed as a classical  
375 mono-partite NLS (Funabashi et al., 2017). However, we noticed that PL, the PY variant, is  
376 located in the immediate downstream region of this NLS. So it is worth investigating whether or  
377 not this C-terminal NLS of KIF17 is a PY-NLS and which importin is used for KIF17 ciliary  
378 trafficking. Recently, a ternary complex consisting of importin  $\beta$ 2, small GTPase Rab8 and  
379 ciliary targeting signals was reported to guide transmembrane protein trafficking to cilium  
380 (Madugula et al., 2016). This data suggests that spatial structure of the ternary complex, but not  
381 specific ciliary targeting sequences, are required for ciliary targeting of membrane proteins. This  
382 highlights that the detailed working model for how importin mediates ciliary import needs to be  
383 further clarified.

384 There is increasing data that nuclear import and ciliary import shares similar mechanisms,  
385 at least in part (Dishinger et al., 2010; Kee et al., 2012; Takao et al., 2014; Del Viso et al., 2016;  
386 Takao et al., 2017; Endicott et al., 2018). First, both the NPC and the ciliary pore complex form  
387 a diffusion barrier (Kee et al., 2012; Endicott et al., 2018). Second, the RanGTP/importin  
388 transport system is also used for ciliary protein trafficking (Fan et al., 2007; Dishinger et al.,  
389 2010; Hurd et al., 2011; Han et al., 2017). Third, some nucleoporins also localize in the ciliary  
390 base to regulate barrier diffusion ability (Dishinger et al., 2010; Del Viso et al., 2016; Endicott et  
391 al., 2018). Our data have shown that RanGTP can regulate cilium formation and ciliary  
392 trafficking of KAP3. One remaining critical question is whether RanGTP has direct effects in  
393 modulating ciliary protein transport. One possibility is that the effect of RanGTP is an indirect  
394 result of inhibiting nuclear import of proteins, like transcriptional factors, which are required for  
395 ciliary formation. By using the unicellular green alga *Chlamydomonas* as a model organism, we  
396 clearly demonstrated that RanGTP function directly regulates ciliary incorporation of the existing  
397 pool of already-synthesized ciliary proteins, which is not dependent on new transcription. In  
398 addition, the dominant negative mutant RanQ69L blocked ciliary trafficking of KAP3. Given that  
399 KAP is required for localization of KIF3A/3B to the assembly sites (Muller et al., 2005), RanGTP  
400 may control cilia formation by directly regulating ciliary targeting of the heterotrimeric kinesin-2  
401 motor. This will in turn affect ciliary assembly and length maintenance due to the importance of  
402 ciliary recruitment and entry of kinesin-2 motor KIF3A/3B/KAP in these processes (Engel et al.,  
403 2009; Ludington et al., 2013). Further work will determine if this is a generalized mechanism for  
404 ciliary protein import and will identify additional RanGTP-regulated ciliary proteins (cargoes)  
405 required for cilium assembly, length control, and function.

406

## 407 **Materials and Methods**

### 408 **Compounds**

409 DMSO, Importazole (IPZ, #SML0341) and Cycloheximide (C1988) were purchased from Sigma-  
410 Aldrich. Indicated concentrations and specific incubation times are used in this study.

411

### 412 **DNA constructs**

413 Plasmids for HA-tagged human KAP3A and KAP3B were kindly from Dr. Benjamin Allen  
414 (University of Michigan). Plasmids for wild-type Ran and point mutants RanG19V and RanT24N  
415 are a generous gift from Dr. Kristen Verhey (University of Michigan). Plasmids expressing MBP  
416 and M9M were from Dr. Yuh Min Chook (University of Texas Southwestern Medical Center).  
417 Plasmids pmCherry-C1-RanQ69L (#30309) was obtained from Addgene under the material  
418 transfer agreement. GeneArt™ *Chlamydomonas* protein expression vector pChlamy\_4 was from  
419 Thermo Fisher Scientific. Recombinant plasmids pChlamy\_4\_Ran1Q73L, EGFP or HA-tagged  
420 KAP3 truncations were generated by ligation-independent cloning strategy as described before  
421 (Zhu et al., 2010) and sequenced in full.

422

### 423 ***Chlamydomonas* strains, mammalian cells and antibodies**

424 Wild-type and KAP-GFP reporter strains were obtained from the *Chlamydomonas* resource  
425 center (CC-125 mt<sup>+</sup> and CC-4296). Strains were grown in liquid Tris-Acetate-Phosphate (TAP)  
426 liquid medium for 18-24 hours prior to experimentation. Mammalian COS-7 and MDCK Cells  
427 were cultured in Dulbecco's Modified Eagle's Medium (DMEM; Invitrogen) supplemented with  
428 10% fetal bovine serum (FBS; Invitrogen). Human TERT-RPE cells were cultured in  
429 DMEM+F12 (1:1) (Invitrogen) containing 10% FBS. Antibodies used in this study are as follows  
430 (IF and WB are short for immunofluorescence and western blot, respectively): Mouse anti-  
431 acetylated  $\alpha$ -tubulin (#T6793, 1:500 for IF) was from Sigma-Aldrich (St. Louis, MO, USA).  
432 Rabbit anti-Cep164 (#22227-1-AP, 1:50 for IF) and rabbit anti-IFT81 (#11744-1-AP, 1:50 for IF)  
433 were from Proteintech. Mouse anti-KAP3A (#610637, 1:20 for IF) was from BD Transduction  
434 Laboratories™. Mouse anti-Myc (AB\_390912, 1:100 for IF) was from Roche. Mouse anti-hnRNP  
435 A1 Antibody (sc-32301, 1:50 for IF) was from Santa Cruz biotechnology. Rabbit anti-myc  
436 (#5625, 1:500 for IF), Rabbit anti-V5 (#13202, 1:1000 for WB), rabbit anti-HA (#3724, 1:100 for  
437 IF) and Rabbit anti-GFP (#2956, 1:100 for IF and 1:1000 for WB, respectively) were from Cell  
438 Signaling Technology.

439

440 **Cell culture and transfection**

441 COS-7, MDCK and hTERT-RPE cells were maintained in a humidified atmosphere at 37°C and  
442 5% CO<sub>2</sub>. Cells for transfection were seeded in an 8-well chamber slide (Lab-Tek) with 0.4 mL  
443 culture medium per well. After overnight growth, the cells became 70-80% confluent and were  
444 transfected with the corresponding plasmids using the transfection reagent FuGENE 6 (Roche)  
445 according to the manufacturer's instructions. In normal condition, COS-7, MDCK and hTERT-  
446 RPE cells are fixed with 4% paraformaldehyde for intracellular localization assay 24 hours post-  
447 transfection. In serum starvation condition for cilium induction, hTERT-RPE cells were cultured  
448 in complete medium for 24 hours post-transfection, then followed to culture in DMEM+F12 (1:1)  
449 with 0.25% FBS for other 24 hours.

450

451 ***Chlamydomonas* transformation**

452 Electroporation transformation was used form rapid transformation of *Chlamydomonas* with the  
453 electroporator NEPA (Nepa Gene, Japan). Transformation was performed following the  
454 published protocol with some modifications (Yamano et al., 2013). The typical 4 days were  
455 necessary to perform the transformation. *Day 1*: pre-cultivation stage: the cells were grown in 5  
456 mL TAP liquid medium for overnight culture. *Day 2*: pre-cultured cells from day 1 were  
457 transferred into a new 50 mL TAP medium in a 250 mL flask with a final OD<sub>730</sub> of 0.1 (usually 1-3  
458 mL pre-cultures added) for overnight culture with 120 rpm/25°C. *Day 3*: cells were harvested by  
459 centrifugation when the cell density reached OD<sub>730</sub> of 0.3-0.4, and washed by GeneArt MAX  
460 Efficiency Transformation Reagent (Invitrogen) 3 times and re-suspended in 250 µL TAP  
461 medium containing 40 mM sucrose. 1.6 µg linearized DNA (pChImay\_4\_Ran1Q73L) was mixed  
462 with 160 µL of the cell suspension for electroporation. After electroporation, the cells were  
463 transferred into 10 mL TAP plus 40 mM sucrose for overnight culture in dim light. *Day 4*: cells  
464 were collected and plated onto 1.5% TAP-agar plate with 10 µg/mL zeocin for growth. The  
465 colonies will be visible 5-7 days later.

466

467 **Immunofluorescence staining**

468 Cells were washed with cold PBS twice, and then fixed with 4% paraformaldehyde in HEPES  
469 (pH 7.4) for 15 min at room temperature. Cells were washed three times with cold PBS and then  
470 incubated with 0.1% Triton X-100 in PBS (pH 7.4) for 10 min. Permeabilized cells were washed  
471 with PBS three times, and then incubated in PBS with 10% normal goat serum and 1% BSA for  
472 1 hour at room temperature to block non-specific binding of the antibodies. Cells are incubated  
473 with diluted primary antibody in PBS with 1% BSA overnight at 4°C. After three times wash with

474 PBS, cells are incubated with the secondary antibody in PBS with 1% BSA for 1 hour at room  
475 temperature in the dark. After washing three times with PBS, cells are mounted with ProLong  
476 Antifade mounting medium with or without DAPI, and kept at 4°C in the dark for further imaging.

477

### 478 **TIRF Microscopy**

479 Samples were prepared as follows: KAP-GFP reporter cells (CC-4296) were cultured in TAP  
480 liquid medium for 18 h, then centrifuged at 1000 rpm for 2 min. 3 µL cell pellets were re-  
481 suspended in 200 µL TAP liquid medium containing either DMSO or 50 µM IPZ. 24 × 50 mm no.  
482 1.5 coverslip was treated with 0.1% poly-lysine for 10 min, and dipped into water and let it air-  
483 dry. Petroleum jelly was used to draw a circle around poly-lysine coated region. 20 µL of cells  
484 were placed inside and allowed to settle for 3 min, and then imaged. KAP-GFP cells were  
485 imaged on a Nikon Ti-E microscope with a 100x 1.49 NA oil objective. Images were obtained  
486 at 23.95 fps with 0.16 µm per pixel by using an Andor DU897 electron multiplying charge-  
487 coupled device (EMCCD) camera. The NIS-Elements software was used to crop the movies  
488 and generate kymographs.

489

### 490 **Ciliary regeneration**

491 *Chlamydomonas* cells were deciliated by pH shock as described before (Witman et al., 1972),  
492 and ciliary regeneration was induced in normal TAP liquid medium. After deciliation, cells were  
493 immediately treated with 10 µg/mL Cycloheximide and/or 10 µM IPZ for 60 min. For IPZ  
494 washout experiment, treated cells were washed 3 times and cultured in fresh TAP liquid  
495 medium (or with 10 µg/mL Cycloheximide). Cells were fixed with 1% glutaraldehyde for 15 min  
496 at room temperature, and cilia length was measured using the line segment tool in ImageJ.

497

### 498 **Statistical analyses**

499 All data are reported as mean values ± standard error of the mean (S.E.M). Graphs and  
500 associated statistical analyses were performed with Prism 6.0C (GraphPad Software, La Jolla,  
501 CA). The unpaired student's t-test was used to assess statistical significance of two groups. A  
502 value of  $p < 0.05$  was considered statistically significant.

503

### 504 **Competing interests**

505 The authors declare no competing or financial interests

506

### 507 **Acknowledgements**

508 We would like to thank Dr. Yuh Min Chook (University of Texas Southwestern Medical Center),  
509 Drs. Kristen Verhey and Benjamin Allen (University of Michigan) for providing DNA plasmids.  
510 We also thank our colleague Dr. Pamela Tran for sharing some reagents. We are grateful to the  
511 members of Dr. Avasthi Lab for comments on the manuscript and Dr. Pawel Niewiadomski  
512 (University of Warsaw) for feedback on our preprint. We would like to thank Ms. Larissa  
513 Dougherty for editing the manuscript. This work was supported by the following grants: startup  
514 of Department of Ophthalmology (P.A.) and the Biomedical Research Training Program (S.H.),  
515 University of Kansas Medical Center; a postdoctoral fellowship from a Kansas Institutional  
516 Development Award (IDeA) from the National Institute of General Medical Sciences of the  
517 National Institutes of Health under grant number P20 GM103418 (S.H.).  
518

## 519 **References**

- 520  
521 Alber F, Dokudovskaya S, Veenhoff LM, Zhang W, Kipper J, Devos D, Suprpto A, Karni-Schmidt  
522 O, Williams R, Chait BT, Sali A. The molecular architecture of the nuclear pore complex. *Nature*.  
523 2007 Nov;450(7170):695  
524  
525 Anvarian Z, Mykytyn K, Mukhopadhyay S, Pedersen LB, Christensen ST. Cellular signalling by  
526 primary cilia in development, organ function and disease. *Nature Reviews Nephrology*. 2019  
527 Feb 7:1.  
528  
529 Beck M, Hurt E. The nuclear pore complex: understanding its function through structural insight.  
530 *Nature reviews Molecular cell biology*. 2017 Feb;18(2):73  
531  
532 Berbari NF, Johnson AD, Lewis JS, Askwith CC, Mykytyn K. Identification of ciliary localization  
533 sequences within the third intracellular loop of G protein-coupled receptors. *Molecular biology of*  
534 *the cell*. 2008 Apr;19(4):1540-7  
535  
536 Breslow DK, Koslover EF, Seydel F, Spakowitz AJ, Nachury MV. An in vitro assay for entry into  
537 cilia reveals unique properties of the soluble diffusion barrier. *J Cell Biol*. 2013 Oct  
538 14;203(1):129-47.  
539  
540 Breslow DK, Holland AJ. Mechanism and regulation of centriole and cilium biogenesis. *Annual*  
541 *review of biochemistry*. 2019 Jun 20  
542  
543 Cole DG, Diener DR, Himelblau AL, Beech PL, Fuster JC, Rosenbaum JL. Chlamydomonas  
544 kinesin-II-dependent intraflagellar transport (IFT): IFT particles contain proteins required for  
545 ciliary assembly in *Caenorhabditis elegans* sensory neurons. *The Journal of cell biology*. 1998  
546 May 18;141(4):993-1008  
547  
548 Deacon SW, Serpinskaya AS, Vaughan PS, Fanarraga ML, Vernos I, Vaughan KT, Gelfand VI.  
549 Dynactin is required for bidirectional organelle transport. *J Cell Biol*. 2003 Feb 3;160(3):297-301  
550  
551 Del Viso F, Huang F, Myers J, Chalfant M, Zhang Y, Reza N, Bewersdorf J, Lusk CP, Khokha  
552 MK. Congenital heart disease genetics uncovers context-dependent organization and function of  
553 nucleoporins at cilia. *Developmental cell*. 2016 Sep 12;38(5):478-92



554  
555 Dishinger JF, Kee HL, Jenkins PM, Fan S, Hurd TW, Hammond JW, Truong YN, Margolis B,  
556 Martens JR, Verhey KJ. Ciliary entry of the kinesin-2 motor KIF17 is regulated by importin- $\beta$ 2 and  
557 RanGTP. *Nature cell biology*. 2010 Jul;12(7):703  
558  
559 Endicott SJ, Brueckner M. NUP98 Sets the Size-Exclusion Diffusion Limit through the Ciliary Base.  
560 *Current Biology*. 2018 May 21;28(10):1643-5  
561  
562 Engel BD, Ludington WB, Marshall WF. Intraflagellar transport particle size scales inversely with  
563 flagellar length: revisiting the balance-point length control model. *The Journal of cell biology*.  
564 2009 Oct 5;187(1):81-9  
565  
566 Fan J, Beck KA. A role for the spectrin superfamily member Syne-1 and kinesin II in cytokinesis.  
567 *Journal of cell science*. 2004 Feb 1;117(4):619-29.  
568  
569 Fan S, Fogg V, Wang Q, Chen XW, Liu CJ, Margolis B. A novel Crumbs3 isoform regulates cell  
570 division and ciliogenesis via importin  $\beta$  interactions. *The Journal of cell biology*. 2007 Jul  
571 30;178(3):387-98.  
572  
573 Fan S, Whiteman EL, Hurd TW, McIntyre JC, Dishinger JF, Liu CJ, Martens JR, Verhey KJ,  
574 Sajjan U, Margolis B. Induction of Ran GTP drives ciliogenesis. *Molecular biology of the cell*.  
575 2011 Dec 1;22(23):4539-48.  
576  
577 Fliegauf M, Benzing T, Omran H. When cilia go bad: cilia defects and ciliopathies. *Nature reviews*  
578 *Molecular cell biology*. 2007 Nov;8(11):880.  
579  
580 Funabashi T, Katoh Y, Michisaka S, Terada M, Sugawa M, Nakayama K. Ciliary entry of KIF17  
581 is dependent on its binding to the IFT-B complex via IFT46–IFT56 as well as on its nuclear  
582 localization signal. *Molecular biology of the cell*. 2017 Mar 1;28(5):624-33  
583  
584 Geng L, Okuhara D, Yu Z, Tian X, Cai Y, Shibasaki S, Somlo S. Polycystin-2 traffics to cilia  
585 independently of polycystin-1 by using an N-terminal RVxP motif. *J Cell Sci*. 2006 Apr  
586 1;119(7):1383-95  
587  
588 Görlich D, Kostka S, Kraft R, Dingwall C, Laskey RA, Hartmann E, Prehn S. Two different subunits  
589 of importin cooperate to recognize nuclear localization signals and bind them to the nuclear  
590 envelope. *Current Biology*. 1995 Apr 1;5(4):383-92  
591  
592 Görlich D, Kutay U. Transport between the cell nucleus and the cytoplasm. *Annual review of cell*  
593 *and developmental biology*. 1999 Nov;15(1):607-60.  
594  
595 Görlich D, Prehn S, Laskey RA, Hartmann E. Isolation of a protein that is essential for the first  
596 step of nuclear protein import. *Cell*. 1994 Dec 2;79(5):767-78  
597  
598 Görlich D, Vogel F, Mills AD, Hartmann E, Laskey RA. Distinct functions for the two importin  
599 subunits in nuclear protein import. *Nature*. 1995 Sep;377(6546):246  
600  
601 Han Y, Xiong Y, Shi X, Wu J, Zhao Y, Jiang J. Regulation of Gli ciliary localization and Hedgehog  
602 signaling by the PY-NLS/karyopherin- $\beta$ 2 nuclear import system. *PLoS biology*. 2017 Aug  
603 4;15(8):e2002063  
604

- 605 Haraguchi K, Hayashi T, Jimbo T, Yamamoto T, Akiyama T. Role of the kinesin-2 family protein,  
606 KIF3, during mitosis. *Journal of Biological Chemistry*. 2006 Feb 17;281(7):4094-9  
607
- 608 Harris EH. *Chlamydomonas* as a model organism. *Annual review of plant biology*. 2001  
609 Jun;52(1):363-406.  
610
- 611 Hirokawa N, Noda Y, Tanaka Y, Niwa S. Kinesin superfamily motor proteins and intracellular  
612 transport. *Nature reviews Molecular cell biology*. 2009 Oct;10(10):682  
613
- 614 Hurd TW, Fan S, Margolis BL. Localization of retinitis pigmentosa 2 to cilia is regulated by Importin  
615  $\beta 2$ . *Journal of cell science*. 2011 Jan 1;jcs-070839.  
616
- 617 Jenkins PM, Hurd TW, Zhang L, McEwen DP, Brown RL, Margolis B, Verhey KJ, Martens JR.  
618 Ciliary targeting of olfactory CNG channels requires the CNGB1b subunit and the kinesin-2 motor  
619 protein, KIF17. *Current biology*. 2006 Jun 20;16(12):1211-6  
620
- 621 Jimbo T, Kawasaki Y, Koyama R, Sato R, Takada S, Haraguchi K, Akiyama T. Identification of a  
622 link between the tumour suppressor APC and the kinesin superfamily. *Nature cell biology*. 2002  
623 Apr;4(4):323.  
624
- 625 Johnson CA, Malicki JJ. The Nuclear Arsenal of Cilia. *Developmental cell*. 2019 Apr  
626 22;49(2):161-70.  
627
- 628 Kee HL, Dishinger JF, Blasius TL, Liu CJ, Margolis B, Verhey KJ. A size-exclusion permeability  
629 barrier and nucleoporins characterize a ciliary pore complex that regulates transport into cilia.  
630 *Nature cell biology*. 2012 Apr;14(4):431  
631
- 632 Kozminski KG, Beech PL, Rosenbaum JL. The *Chlamydomonas* kinesin-like protein FLA10 is  
633 involved in motility associated with the flagellar membrane. *The Journal of cell biology*. 1995 Dec  
634 15;131(6):1517-27  
635
- 636 Lange A, Mills RE, Lange CJ, Stewart M, Devine SE, Corbett AH. Classical nuclear localization  
637 signals: definition, function, and interaction with importin  $\alpha$ . *Journal of Biological Chemistry*. 2007  
638 Feb 23;282(8):5101-5  
639
- 640 Lee BJ, Cansizoglu AE, Süel KE, Louis TH, Zhang Z, Chook YM. Rules for nuclear localization  
641 sequence recognition by karyopherin $\beta 2$ . *Cell*. 2006 Aug 11;126(3):543-58  
642
- 643 Le Bot N, Antony C, White J, Karsenti E, Vernos I. Role of xklp3, a subunit of the *Xenopus* kinesin  
644 II heterotrimeric complex, in membrane transport between the endoplasmic reticulum and the  
645 Golgi apparatus. *The Journal of cell biology*. 1998 Dec 14;143(6):1559-73.  
646
- 647 Li L, Tian G, Peng H, Meng D, Wang L, Hu X, Tian C, He M, Zhou J, Chen L, Fu C. New class  
648 of transcription factors controls ciliary assembly by recruiting RNA polymerase II in  
649 *Chlamydomonas*. *Proceedings of the National Academy of Sciences*. 2018 Apr  
650 24;115(17):4435-40  
651
- 652 Lounsbury KM, Richards SA, Carey KL, Macara IG. Mutations within the Ran/TC4 GTPase  
653 Effects on regulatory factor interactions and subcellular localization. *Journal of Biological  
654 Chemistry*. 1996 Dec 20;271(51):32834-41  
655

- 656 Ludington WB, Wemmer KA, Lechtreck KF, Witman GB, Marshall WF. Avalanche-like behavior  
657 in flagellar import. *Proceedings of the National Academy of Sciences*. 2013 Feb 14;201217354.  
658
- 659 Macho B, Brancorsini S, Fimia GM, Setou M, Hirokawa N, Sassone-Corsi P. CREM-dependent  
660 transcription in male germ cells controlled by a kinesin. *Science*. 2002 Dec 20;298(5602):2388-  
661 90  
662
- 663 Madugula V, Lu L. A ternary complex comprising transportin1, Rab8 and the ciliary targeting  
664 signal directs proteins to ciliary membranes. *J Cell Sci*. 2016 Oct 15;129(20):3922-34.  
665
- 666 Maiuri T, Woloshansky T, Xia J, Truant R. The huntingtin N17 domain is a multifunctional CRM1  
667 and Ran-dependent nuclear and cilial export signal. *Human molecular genetics*. 2013 Apr  
668 1;22(7):1383-94  
669
- 670 Mazelova J, Astuto-Gribble L, Inoue H, Tam BM, Schonteich E, Prekeris R, Moritz OL, Randazzo  
671 PA, Deretic D. Ciliary targeting motif VxPx directs assembly of a trafficking module through Arf4.  
672 *The EMBO journal*. 2009 Feb 4;28(3):183-92  
673
- 674 McClure-Begley TD, Klymkowsky MW. Nuclear roles for cilia-associated proteins. *Cilia*. 2017  
675 Dec;6(1):8.  
676
- 677 Mitchison HM, Valente EM. Motile and non-motile cilia in human pathology: from function to  
678 phenotypes. *The Journal of pathology*. 2017 Jan;241(2):294-309.  
679
- 680 Moore MS, Blobel G. The GTP-binding protein Ran/TC4 is required for protein import into the  
681 nucleus. *Nature*. 1993 Oct;365(6447):66  
682
- 683 Morris RL, Scholey JM. Heterotrimeric kinesin-II is required for the assembly of motile 9+ 2 ciliary  
684 axonemes on sea urchin embryos. *The Journal of cell biology*. 1997 Sep 8;138(5):1009-22.  
685
- 686 Morris RL, English CN, Lou JE, Dufort FJ, Nordberg J, Terasaki M, Hinkle B. Redistribution of the  
687 kinesin-II subunit KAP from cilia to nuclei during the mitotic and ciliogenic cycles in sea urchin  
688 embryos. *Developmental biology*. 2004 Oct 1;274(1):56-69.  
689
- 690 Mueller J, Perrone CA, Bower R, Cole DG, Porter ME. The FLA3 KAP subunit is required for  
691 localization of kinesin-2 to the site of flagellar assembly and processive anterograde intraflagellar  
692 transport. *Molecular biology of the cell*. 2005 Mar 1;16(3):1341-54  
693
- 694 Murawala P, Tripathi MM, Vyas P, Salunke A, Joseph J. Nup358 interacts with APC and plays a  
695 role in cell polarization. *J Cell Sci*. 2009 Sep 1;122(17):3113-22  
696
- 697 Nagata KI, Puls A, Futter C, Aspenstrom P, Schaefer E, Nakata T, Hirokawa N, Hall A. The  
698 MAP kinase kinase kinase MLK2 co-localizes with activated JNK along microtubules and  
699 associates with kinesin superfamily motor KIF3. *The EMBO journal*. 1998 Jan 1;17(1):149-58  
700
- 701 Neumann N, Jeffares DC, Poole AM. Outsourcing the nucleus: nuclear pore complex genes are  
702 no longer encoded in nucleomorph genomes. *Evolutionary Bioinformatics*. 2006  
703 Jan;2:117693430600200023  
704
- 705 Pazour GJ, Dickert BL, Witman GB. The DHC1b (DHC2) isoform of cytoplasmic dynein is required  
706 for flagellar assembly. *The Journal of cell biology*. 1999 Feb 8;144(3):473-81.

707  
708 Plotnikova OV, Pugacheva EN, Golemis EA. Primary cilia and the cell cycle. *Methods in cell*  
709 *biology* 2009 Jan 1 (Vol. 94, pp. 137-160). Academic Press.  
710  
711 Porter ME, Bower R, Knott JA, Byrd P, Dentler W. Cytoplasmic dynein heavy chain 1b is required  
712 for flagellar assembly in *Chlamydomonas*. *Molecular biology of the cell*. 1999 Mar 1;10(3):693-  
713 712.  
714  
715 Rosenbaum JL, Moulder JE, Ringo DL. Flagellar elongation and shortening in *Chlamydomonas*:  
716 the use of cycloheximide and colchicine to study the synthesis and assembly of flagellar proteins.  
717 *The Journal of cell biology*. 1969 May 1;41(2):600-19.  
718  
719 Rosenbaum JL, Witman GB. Intraflagellar transport. *Nature reviews Molecular cell biology*. 2002  
720 Nov;3(11):813.  
721  
722 Sarpal R, Todi SV, Sivan-Loukianova E, Shirolkar S, Subramanian N, Raff EC, Erickson JW, Ray  
723 K, Eberl DF. *Drosophila* KAP interacts with the kinesin II motor subunit KLP64D to assemble  
724 chordotonal sensory cilia, but not sperm tails. *Current biology*. 2003 Sep 30;13(19):1687-96  
725  
726 Satir P, Satir BH. The conserved ancestral signaling pathway from cilium to nucleus. *Journal of*  
727 *cell science*. 2019 Aug 1;132(15):jcs230441.  
728  
729 Seungoh LE, Eunyong LE, Hyunjin SH, Hwasun HA, Wonja CH, Wankee KI. Human kinesin  
730 superfamily member 4 is dominantly localized in the nuclear matrix and is associated with  
731 chromosomes during mitosis. *Biochemical Journal*. 2001 Dec 15;360(3):549-56.  
732 Shimizu K, Kawabe H, Minami S, Honda T, Takaishi K, Shirataki H, Takai Y. SMAP, an Smg  
733 GDS-associating protein having arm repeats and phosphorylated by Src tyrosine kinase.  
734 *Journal of Biological Chemistry*. 1996 Oct 25;271(43):27013-7  
735  
736 Signor D, Wedaman KP, Orozco JT, Dwyer ND, Bargmann CI, Rose LS, Scholey JM. Role of a  
737 class DHC1b dynein in retrograde transport of IFT motors and IFT raft particles along cilia, but  
738 not dendrites, in chemosensory neurons of living *Caenorhabditis elegans*. *The Journal of cell*  
739 *biology*. 1999 Nov 1;147(3):519-30.  
740  
741 Soderholm JF, Bird SL, Kalab P, Sampathkumar Y, Hasegawa K, Uehara-Bingen M, Weis K,  
742 Heald R. Importazole, a small molecule inhibitor of the transport receptor importin- $\beta$ . *ACS*  
743 *chemical biology*. 2011 Apr 21;6(7):700-8  
744  
745 Soniat M, Chook YM. Karyopherin- $\beta$ 2 recognition of a PY-NLS variant that lacks the proline-  
746 tyrosine motif. *Structure*. 2016 Oct 4;24(10):1802-9  
747  
748 Stauber T, Simpson JC, Pepperkok R, Vernos I. A role for kinesin-2 in COPI-dependent recycling  
749 between the ER and the Golgi complex. *Current biology*. 2006 Nov 21;16(22):2245-51.  
750  
751 Strambio-De-Castillia C, Niepel M, Rout MP. The nuclear pore complex: bridging nuclear  
752 transport and gene regulation. *Nature reviews Molecular cell biology*. 2010 Jul;11(7):490.  
753  
754 Takao D, Dishinger JF, Kee HL, Pinskey JM, Allen BL, Verhey KJ. An assay for clogging the  
755 ciliary pore complex distinguishes mechanisms of cytosolic and membrane protein entry. *Current*  
756 *biology*. 2014 Oct 6;24(19):2288-94.  
757

- 758 Takao D, Wang L, Boss A, Verhey KJ. Protein interaction analysis provides a map of the spatial  
759 and temporal organization of the ciliary gating zone. *Current Biology*. 2017 Aug 7;27(15):2296-  
760 306
- 761
- 762 Torrado B, Graña M, Badano JL, Irigoín F. Ciliary entry of the Hedgehog transcriptional activator  
763 Gli2 is mediated by the nuclear import machinery but differs from nuclear transport in being Imp-  
764  $\alpha/\beta$ 1-independent. *PLoS One*. 2016 Aug 31;11(8):e0162033.
- 765
- 766 Tenney A, Price M, Macatangay J, Hatt D, Kline T, Berezuk MA. Partial Characterization of an  
767 Interaction between Kinesin Associated Protein 3 (Kap3) of Kinesin-2 and the Actin Cytoskeleton.  
768 *Austin Biochem*. 2016;1(1):1003
- 769
- 770 Walther Z, Vashishtha M, Hall JL. The *Chlamydomonas* FLA10 gene encodes a novel kinesin-  
771 homologous protein. *The Journal of cell biology*. 1994 Jul 1;126(1):175-88.
- 772
- 773 Wentz SR, Rout MP. The nuclear pore complex and nuclear transport. *Cold Spring Harbor*  
774 *perspectives in biology*. 2010 Oct 1;2(10):a000562.
- 775
- 776 Witman GB, Carlson K, Berliner J, Rosenbaum JL. *Chlamydomonas* cilia: I. Isolation and  
777 electrophoretic analysis of microtubules, matrix, membranes, and mastigonemes. *The Journal of*  
778 *Cell Biology*. 1972 Sep 1;54(3):507-39.
- 779
- 780 Wood CR, Huang K, Diener DR, Rosenbaum JL. The cilium secretes bioactive ectosomes.  
781 *Current Biology*. 2013 May 20;23(10):906-11.
- 782
- 783 Yamano T, Iguchi H, Fukuzawa H. Rapid transformation of *Chlamydomonas reinhardtii* without  
784 cell-wall removal. *Journal of bioscience and bioengineering*. 2013 Jun 1;115(6):691-4
- 785
- 786 Zhao C, Omori Y, Brodowska K, Kovach P, Malicki J. Kinesin-2 family in vertebrate ciliogenesis.  
787 *Proceedings of the National Academy of Sciences*. 2012 Feb 14;109(7):2388-93.
- 788
- 789 Zhu D, Zhong X, Tan R, Chen L, Huang G, Li J, Sun X, Xu L, Chen J, Ou Y, Zhang T. High-  
790 throughput cloning of human liver complete open reading frames using homologous  
791 recombination in *Escherichia coli*. *Analytical biochemistry*. 2010 Feb 15;397(2):162-7.

792  
793

## 794 **Figure legends**

795  
796

797 **Figure 1. Kinesin-associated protein KAP3 localizes in both the cilium and nucleus. A.** HA  
798 -tagged KAP3A or KAP3B were transfected into hTERT-RPE cells. After 24 hours transfection,  
799 cilium was induced under 0.25% serum starvation for another 24 hours. Cells were fixed with 4%  
800 paraformaldehyde (PFA) and stained with rabbit anti-HA and mouse anti- $\alpha$ -tubulin antibodies.  
801 **B.** HA-tagged KAP3A or KAP3B were expressed in non-ciliated COS-7 cells, After 24 hour  
802 transfection, cells were fixed with 4% PFA and stained with anti-HA antibody. Cell nuclei are  
803 pseudo-colored blue, following staining with DAPI. **C.** EGFP tagged KAP3A or KAP3B were  
expressed in MDCK cells. **D.** Schematic illustration of EGFP tagged KAP3 truncated derivatives.

804 **E.** Western blotting analysis of the expression of EGFP tagged KAP3 transiently transfected  
805 MDCK cells. **F.** Mapping the domains required for nuclear localization of KAP3A in MDCK cells:  
806 a series of EGFP tagged KAP3A truncations were transfected into MDCK cells. 24 hours after  
807 transfection, cells were fixed with 4% PFA and stained with mouse anti-HA antibody and DAPI.

808

809 **Figure 2. RanGTP regulates nuclear translocation of KAP3.** **A.** Dominant negative form of  
810 Ran blocked nuclear localization of KAP3 in COS-7 cells. mCherry tagged wild-type Ran or GTP  
811 bound dominant mutant RanQ69L were co-transfected with EGFP-KAP3 into COS-7 cells. After  
812 24 h transfection, cells were fixed with 4% PFA and stained with anti-EGFP antibody and DAPI  
813 **B.** Mapping the domains within KAP3 that is mediated by RanGTP mediated nuclear import. a  
814 series of EGFP tagged KAP3 truncations were co- transfected with GTP-locked Ran mutant Q69L  
815 into COS-7 cells. After 24 h transfection, cells were fixed with 4% PFA and stained with anti-EGFP  
816 antibody and DAPI.

817

818 **Figure 3. Armadillo repeat domain 6-9 targets KAP3 to the ciliary base.** **A.** Schematic  
819 illustration of full-length human KAP3 and its truncated derivatives for analyzing ciliary targeting.  
820 **B.** Ciliary base localization of KAP3 truncations in hTERT-RPE cells. hTERT-RPE cells were  
821 transfected with various truncated constructs of KAP3. After 24 h transfection, the cells suffered  
822 serum starvation for cilium induction for another 24 hours and fixed with 4% PFA and co-stained  
823 with mouse anti-acetylated  $\alpha$ -tubulin (red) and rabbit anti-EGFP antibodies (green). nuclei are  
824 stained with DAPI (blue).

825

826 **Figure 4. Dominant negative Ran mutants reduced percent ciliation in hTERT-RPE cells.** **A.**  
827 dominant negative Ran mutants blocked cilia formation in hTERT-RPE cells. The plasmids  
828 expressing Ran mutant were transfected into hTERT-RPE cells. 24 h after transfection, Cilium  
829 was induced via serum starvation for another 24 h. The cells were fixed and labeled for acetylated  
830  $\alpha$ -tubulin and nuclei are stained with DAPI. **B.** hTERT-RPE cells expressing dominant Ran mutant  
831 reduced the percentage of ciliated cells. **C.** Quantification of cilia length. Data are presented as  
832 the mean $\pm$ SEM. The unpaired *t*-test analysis was performed. *P*-value of great than 0.05 was  
833 considered no significant difference. The experiment was repeated three times. **D.** Localization of  
834 IFT81 and KAP3 in ciliated hTERT-RPE cells expressing RanQ69L. Cilium was induced in  
835 hTERT-RPE cells expressing RanQ69L via serum starvation. The cells were fixed and co-stained  
836 with acetylated  $\alpha$ -tubulin and IFT81, or KAP3 and Cep164. Nuclei are stained with DAPI.

837

838 **Figure 5. Inhibition of RanGTP function shortens cilia length and blocks ciliary trafficking**  
839 **of KAP under steady-state conditions in *Chlamydomonas*.** **A.** Dose dependent inhibition of  
840 cilia length by the small molecular inhibitor IPZ, which disrupts RanGTP interacting with importin  
841  $\beta$ . CC125 cells were treated with different concentration of IPZ for 120 min, fixed with 1%  
842 glutaraldehyde, and imaged by DIC microscope at 40 $\times$  magnification. **B.** Quantification of cilia  
843 length. The unpaired *t*-test analysis was performed. *P*-value of less than 0.05 was considered  
844 significant difference. **C.** Expression of the dominant negative mutant Ran1Q73L, corresponding  
845 to human RanQ69L, exhibits either clumpy cells or shortened ciliary length in *Chlamydomonas*.  
846 Linearized expression plasmid pChlamy-4-Ran1Q73L was transformed into CC-125 cells and  
847 initially screened by colony PCR. The expression of Ran1Q73L was finally detected by western  
848 blotting analysis via V5 antibody. Due to cleavage efficiency of 2A peptide in *Chlamydomonas*,  
849 Ran1Q73L was existed in two forms: Ran1Q73L (correctly processed, green arrow) and Ble-2A-  
850 Ran1Q73L (fused with the selection marker, red arrow). Asterisk indicates that the negative  
851 control merely expresses zeocin resistance gene Ble. The representative images for the control  
852 Cells and Ran1Q73L expressing cells were shown. **D.**  
853 Inhibiting of Ran function by IPZ reduced ciliary localization of KAP. KAP-GFP reporter cells are  
854 treated with 20  $\mu$ M IPZ for 2 h, fixed with 100% methanol, and mounted with prolong gold anti-  
855 fade mounting medium. Ciliary localization of KAP is dramatically reduced after IPZ treatment in  
856 *Chlamydomonas*. **E.** Kymograph analysis indicates IPZ blocked ciliary entry of KAP. KAP-GFP  
857 cells were treated with either DMSO or 50  $\mu$ M IPZ for 20 min, and then used for TIRF microscopy  
858 to record the dynamic behavior of KAP.

859  
860 **Figure 6. RanGTP directly regulates ciliary protein incorporation in *Chlamydomonas***  
861 **during ciliary regeneration** **A.** Possible models of incorporation of existing ciliary protein into  
862 cilia after treated with cycloheximide (CHX) and importazole (IPZ) during ciliary regeneration.  
863 Inhibition of new protein synthesis by CHX results in half-length cilia. **B.** Wild-type CC-125 cells  
864 were deciliated, and cilia were regenerated for 1 hour in the presence of different small  
865 molecular inhibitors: 10  $\mu$ g/mL CHX, 10  $\mu$ M IPZ or the combination of 10  $\mu$ g/mL CHX and 10  $\mu$ M  
866 IPZ. Cells were fixed with 1% glutaraldehyde and imaged by DIC microscope at  
867 40 $\times$ magnification. **C.** Schematic representation of IPZ washout assay under the absence of  
868 newly synthesized protein. **D.** Deciliated cells were treated with the combination of 10  $\mu$ g/mL  
869 CHX and 10  $\mu$ M IPZ for 60 min. Then IPZ, not CHX, was washed out, and cilia were  
870 regenerated for other 60 min. Cells were fixed with 1% glutaraldehyde and cilia length was  
871 measured using ImageJ software.

872

873 **Figure S1. Nuclear translocation of KAP3 is transport receptor importin  $\beta$ 2 independent. A.**

874 Importin  $\beta$ 2 mediates nuclear translocation of hnRNP A1. The plasmid myc-MBP-M9M expressing  
875 myc-MBP fused inhibitory peptide M9M of importin  $\beta$ 2, or its control merely expressing myc-MBP,  
876 was transfected into COS-7 cells. 24 hours after transfection, cells were fixed with 4% PFA and  
877 co-stained with rabbit anti-myc (Red) and mouse anti-hnRNP A1 antibodies (green). nuclei are  
878 stained with DAPI (blue). **B.** Importin  $\beta$ 2 isn't required for nuclear localization of KAP3. Importin  
879  $\beta$ 2 mediates nuclear translocation of hnRNP A1. The plasmid myc-MBP-M9M or its control was  
880 co-transfected with EGFP-KAP3 into COS-7 cells. 24 hours after transfection, cells were fixed  
881 with 4% PFA and co-stained with mouse anti-myc (Red) and rabbit anti-EGFP antibodies (green).  
882 nuclei are stained with DAPI (blue).

883

884 **Figure S2. Subcellular localization of wild-type Ran and its dominant negative mutants in**

885 **serum starved hTERT-RPE cells.** Plasmids for expressing wild-type Ran or its point mutants  
886 (RanQ69L, RanG19V and RanT24N) were transfected into hTERT-RPE cells. After 24 h  
887 transfection, the cells were suffered for serum starvation for another 24 h, and then fixed with 4%  
888 PFA. The intracellular localization of these proteins was visualized via immunofluorescence  
889 staining.

890

891 **Figure S3. Alignment of human Ran with *Chlamydomonas* Ran like small GTPase (Ran1).**

892 Human Ran (NCBI reference sequence: NP\_006316.1) and *Chlamydomonas* Ran1 (Phytozome  
893 reference sequence: cre03.g191050.t1.2) were aligned using the Clustal Omega software.  
894 Conserved residues are indicated (asterisk indicates fully conserved residues; colon indicates  
895 residues with strongly similar properties; period indicates residues with weakly similar  
896 properties). The key residues required for GTP or GDP bound state of Ran are marked in red.

897

898 **Figure S4. RanGTP regulates ciliary protein incorporation in *Chlamydomonas* regardless of the**

899 **presence of new synthesized proteins. A.** Possible models for RanGTP regulating ciliary protein  
900 incorporation in the presence of new synthesized proteins. **B.** Deciliated cells were treated 10  
901  $\mu$ M IPZ for 60 min. Then IPZ was washed and cilia were regenerated for another 60 min. Cells  
902 were fixed with 1% glutaraldehyde and cilia length was measured using ImageJ software.



## Figure 1

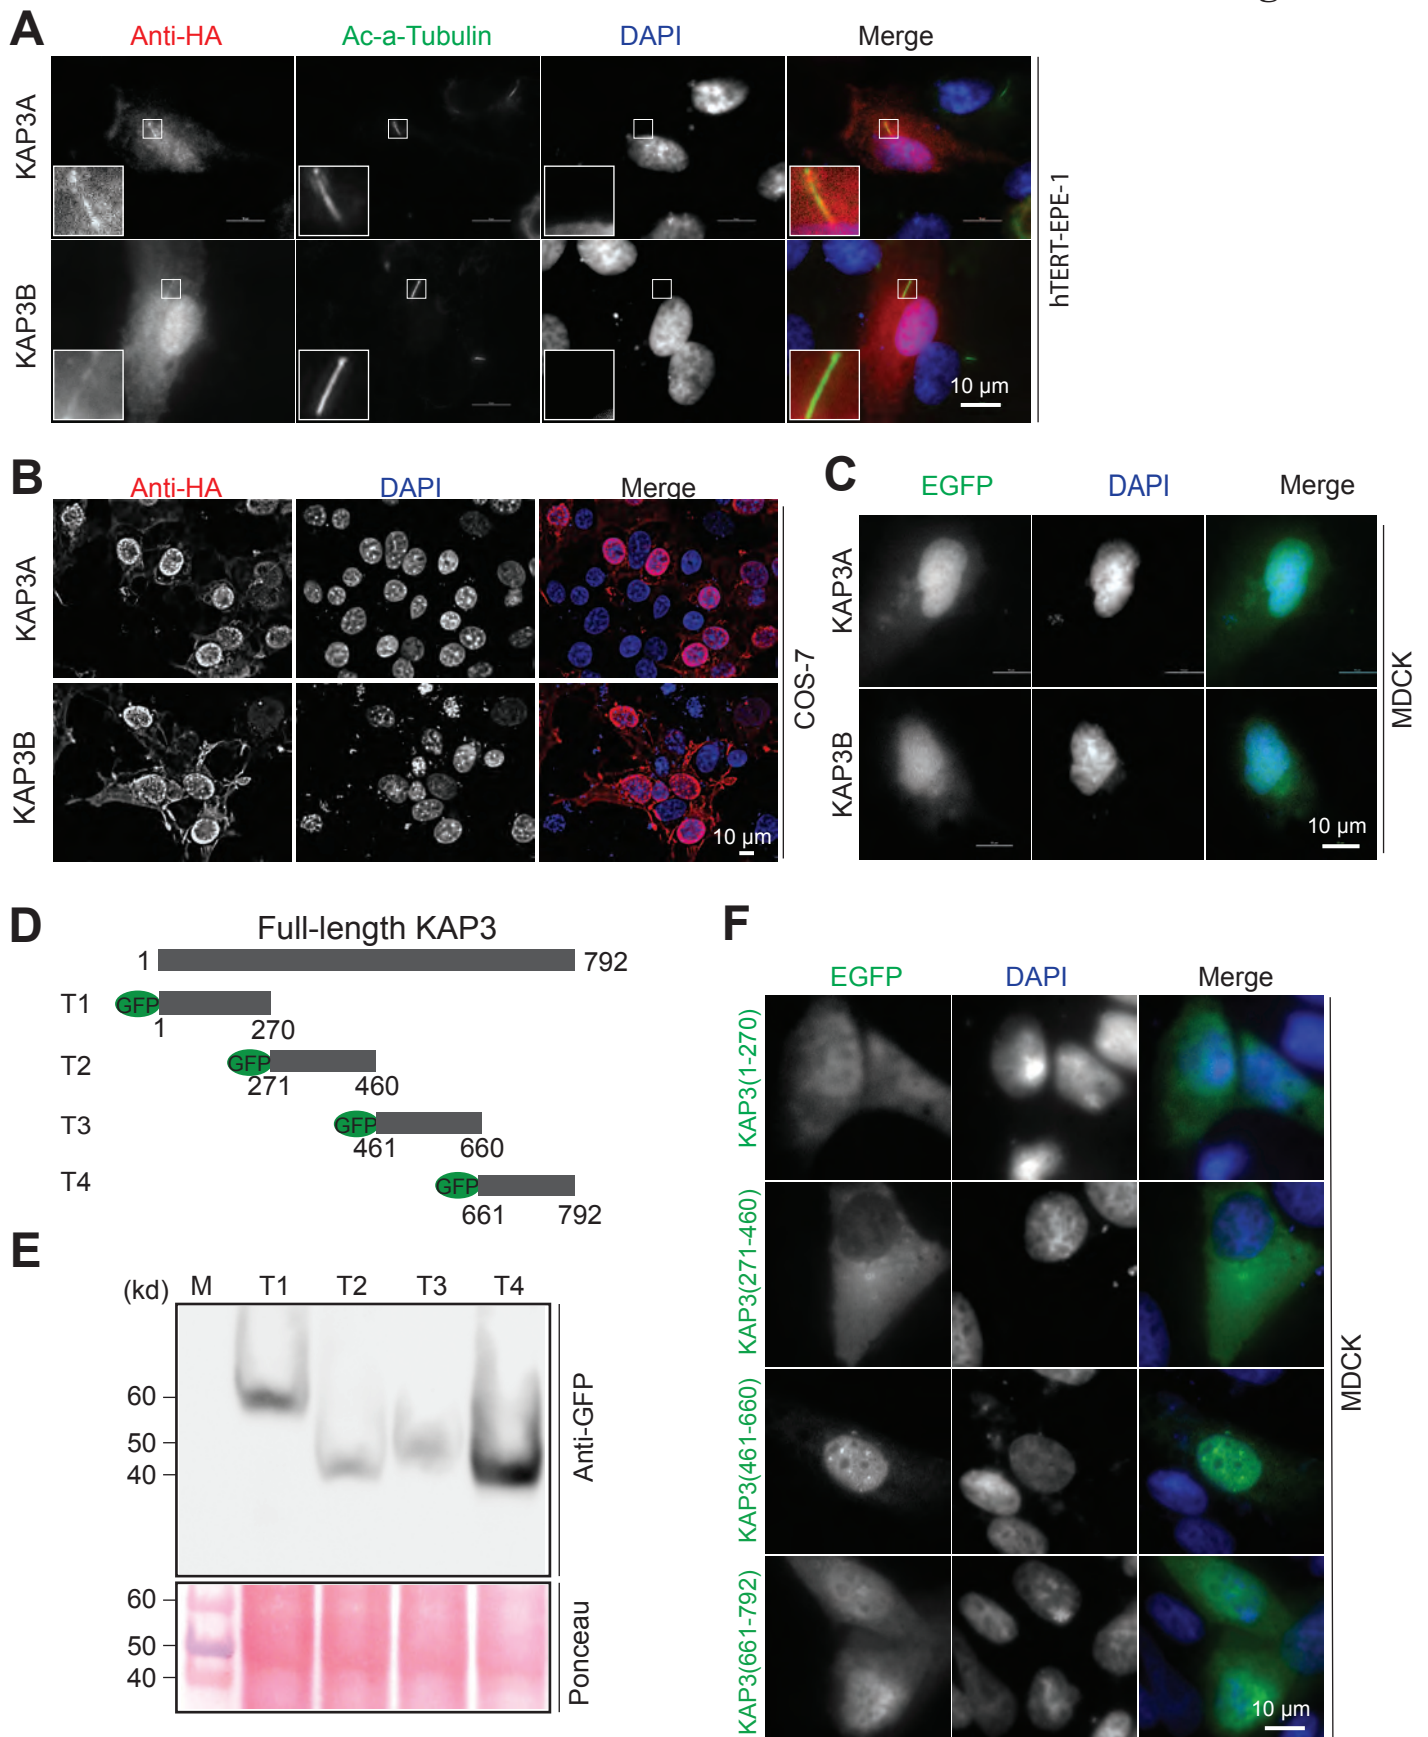

**Figure 1. Kinesin-associated protein KAP3 localizes in both the cilium and nucleus**

## Figure 2

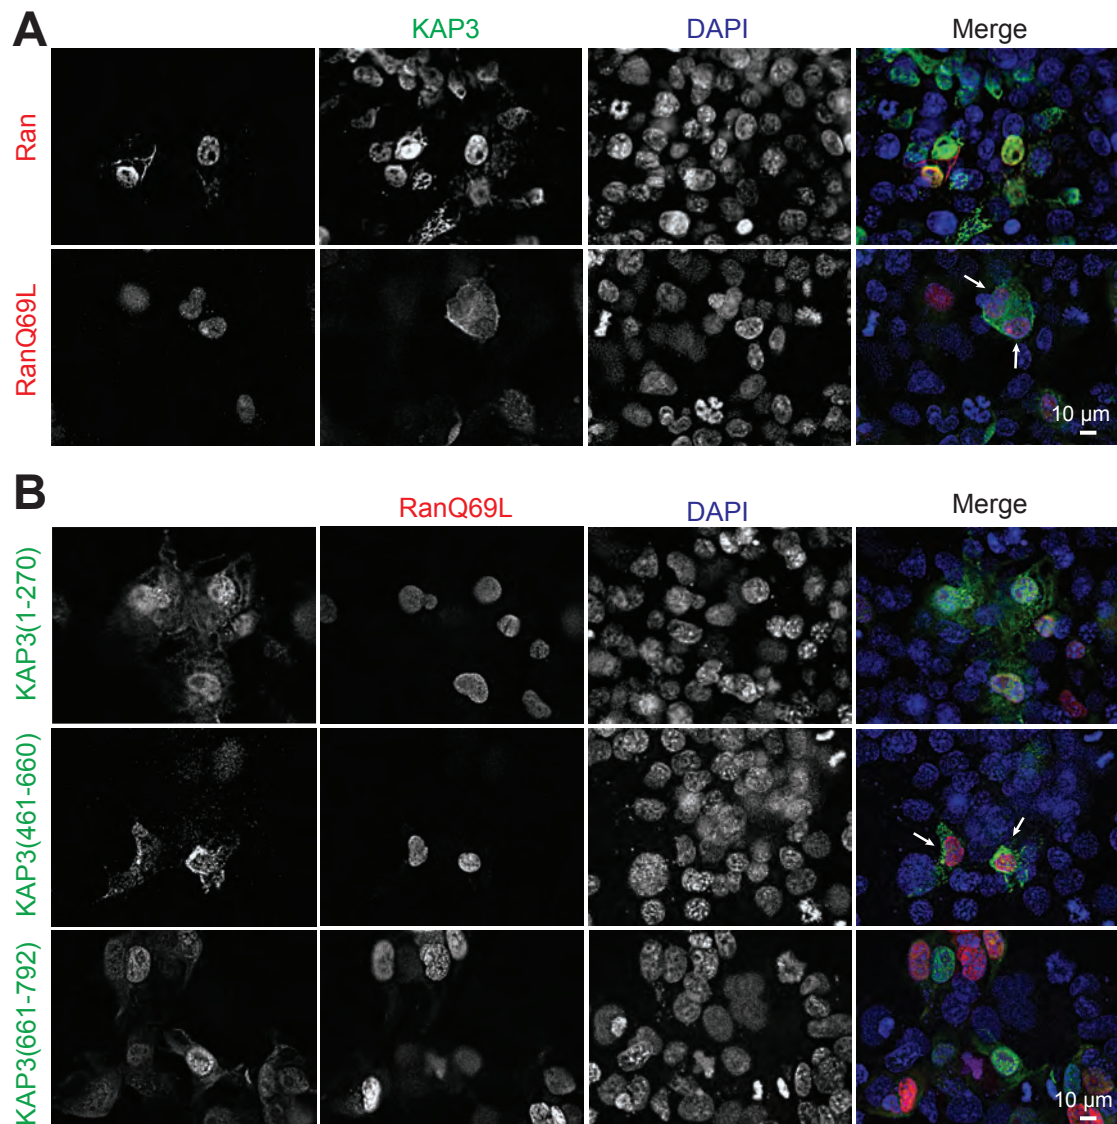

**Figure 2. RanGTP regulates nuclear translocation of KAP3.**

### Figure 3

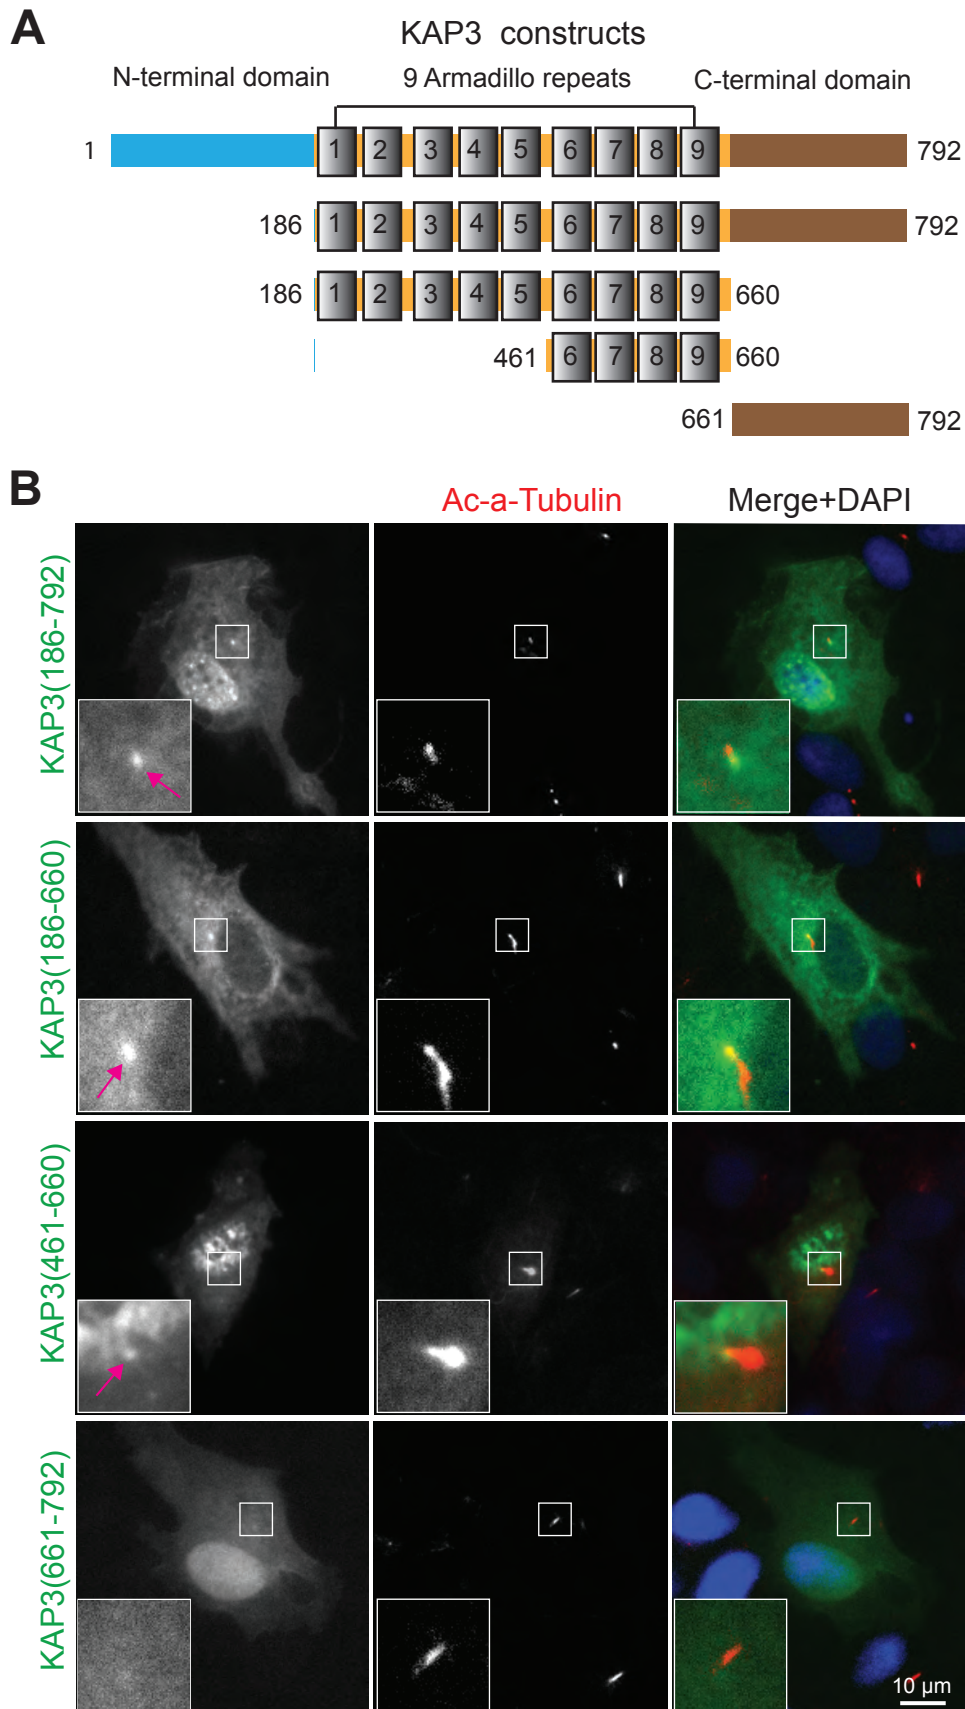

Figure 3. Armadillo repeat domain 6-9 targets KAP3 to the ciliary base

## Figure 4

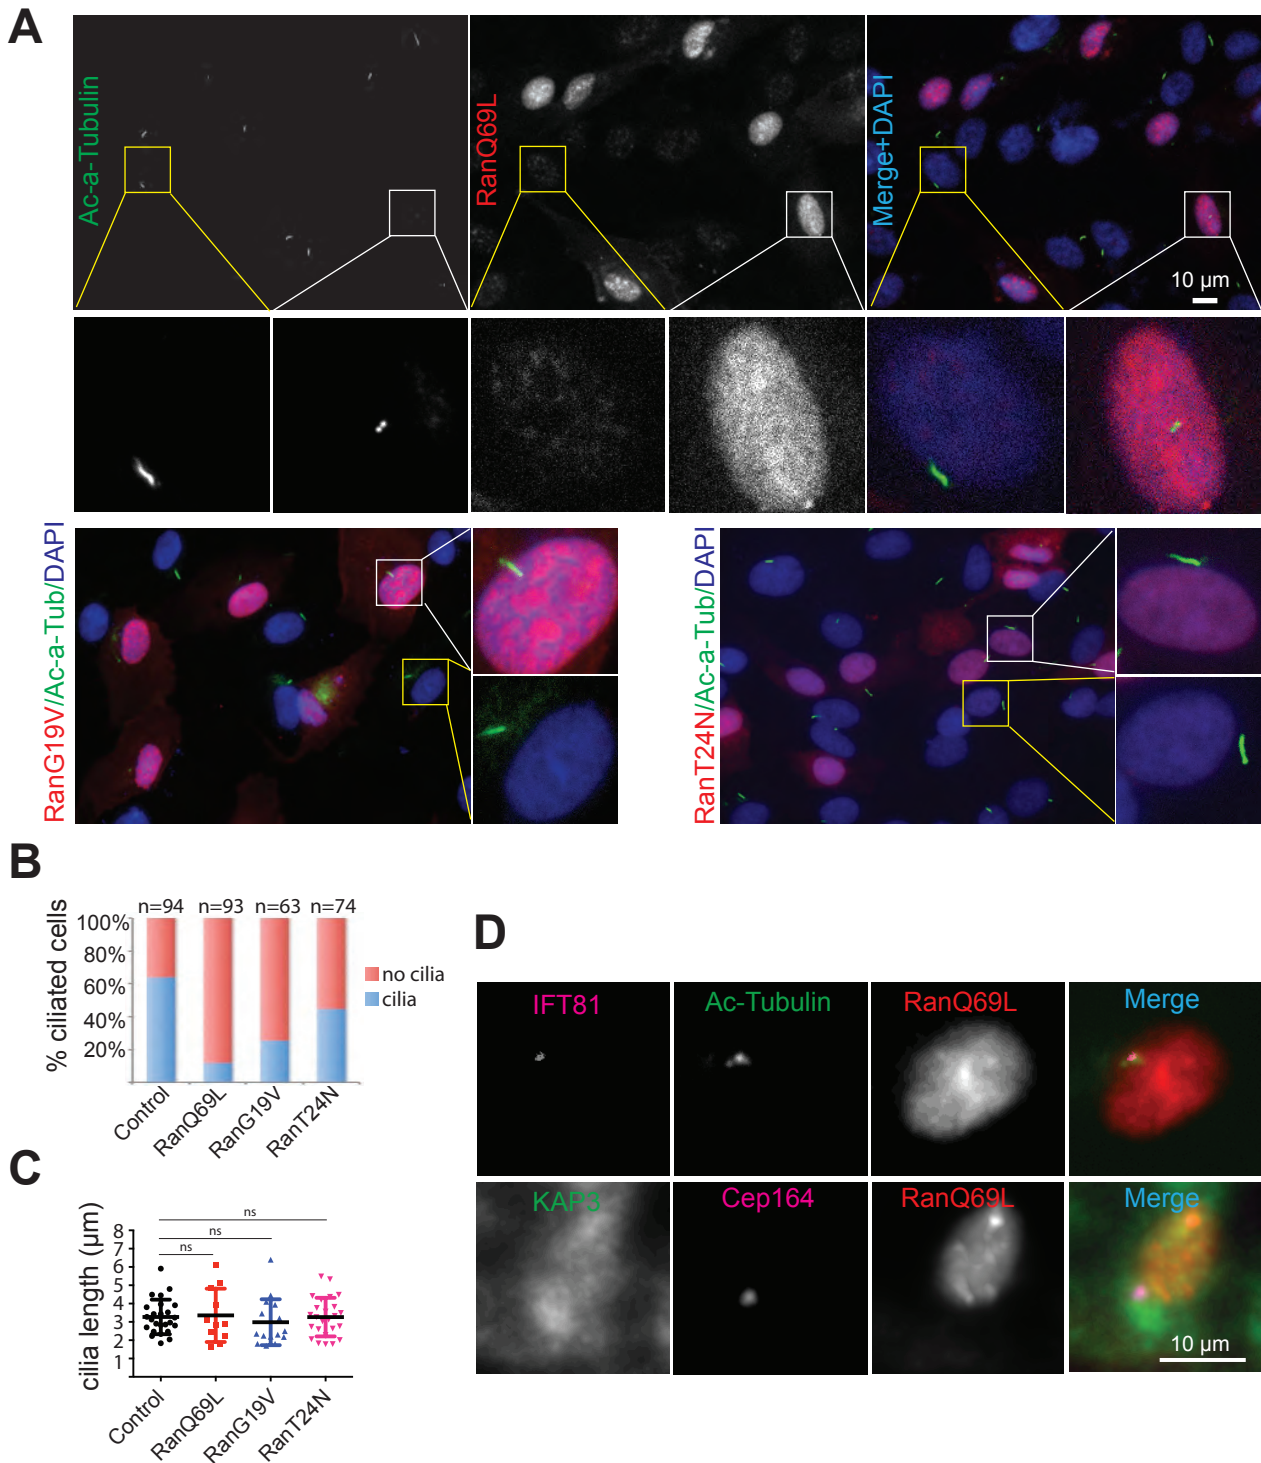

**Figure 4. Dominant negative Ran mutants reduce percent ciliation in hTERT-RPE cells**

## Figure 5

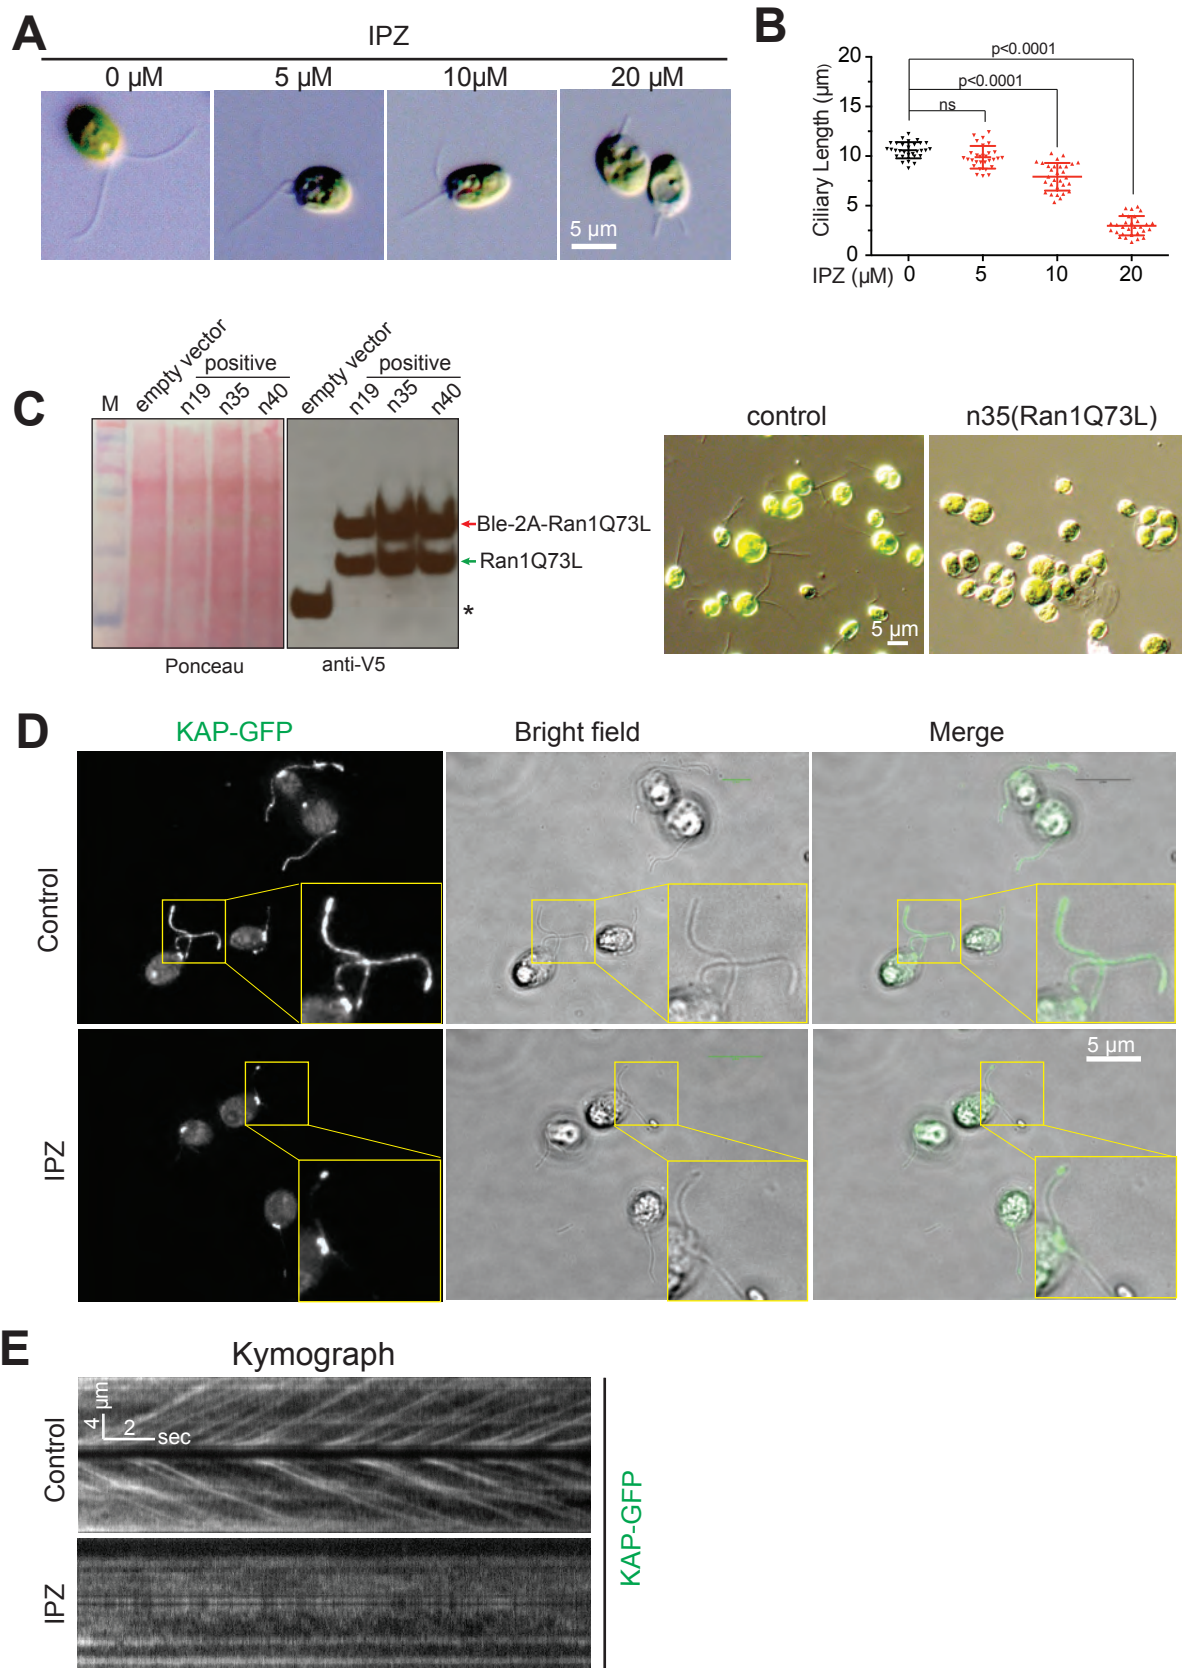

**Figure 5. Inhibition of RanGTP function shortens cilia length and blocks ciliary trafficking of KAP under steady-state conditions in *Chlamydomonas*.**

## Figure 6

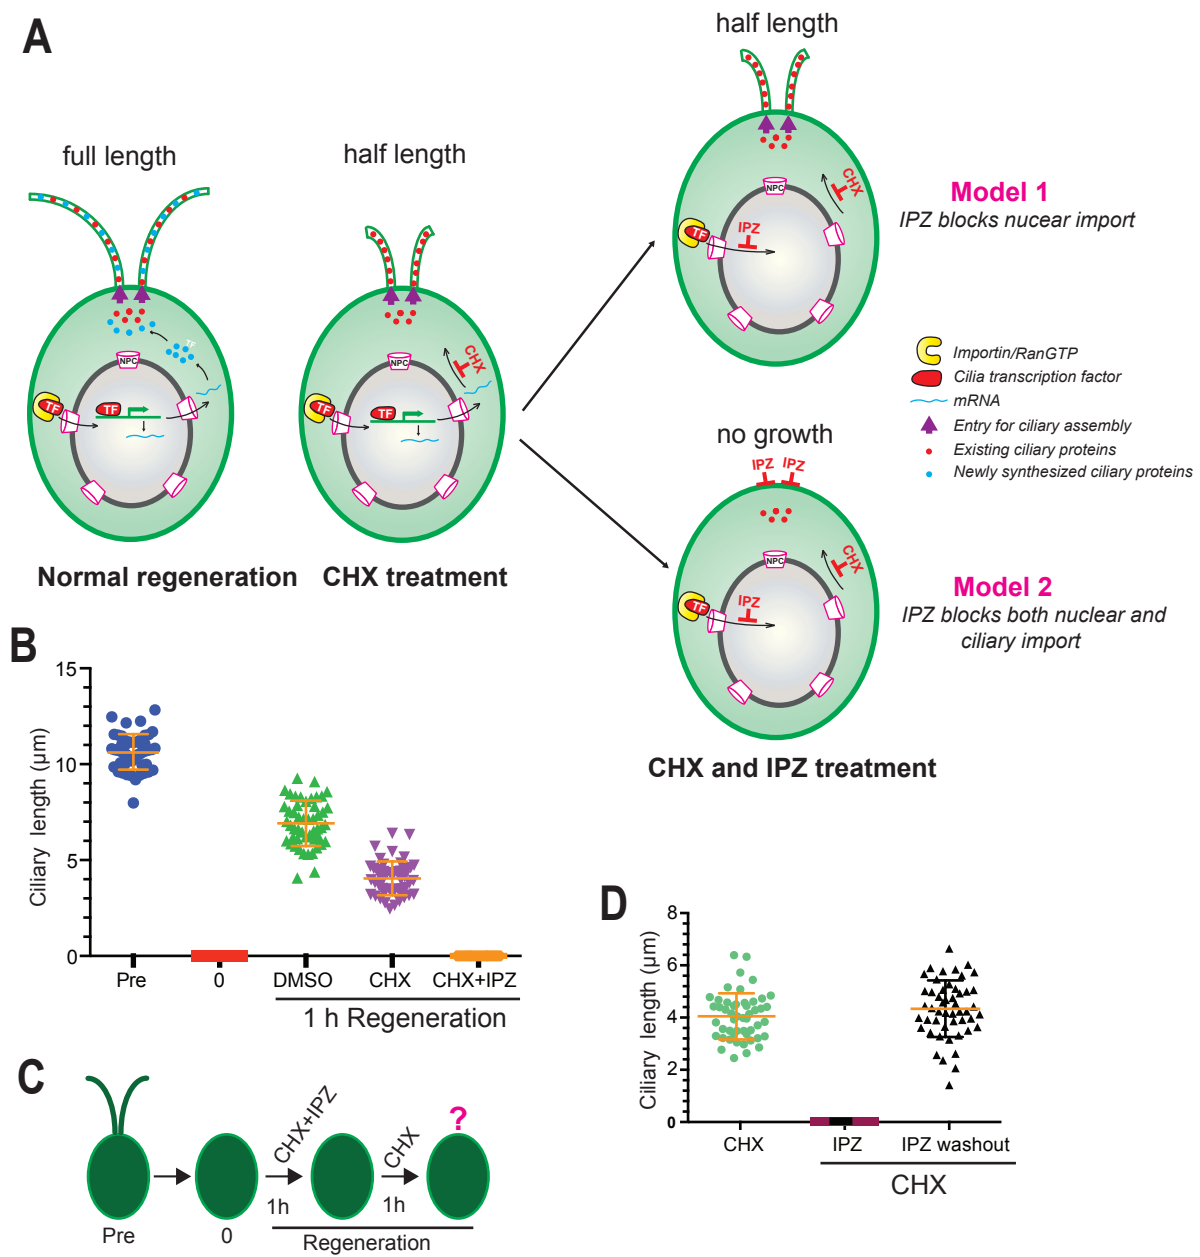

**Figure 6. RanGTP directly regulates ciliary protein incorporation in *Chlamydomonas* during ciliary regeneration**

## Figure S1

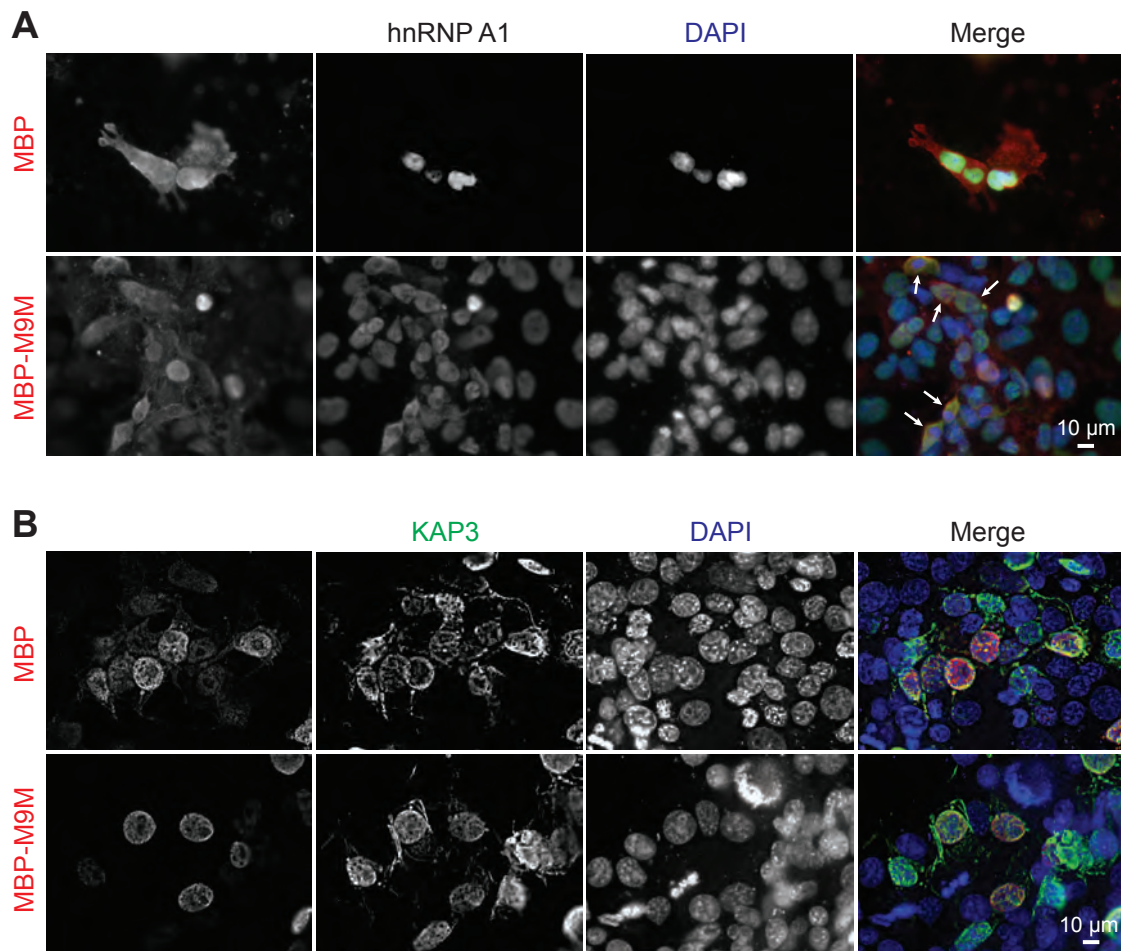

**Figure S1. Nuclear translocation of KAP3 is transport receptor importin  $\beta$ 2 independent**

## Figure S2

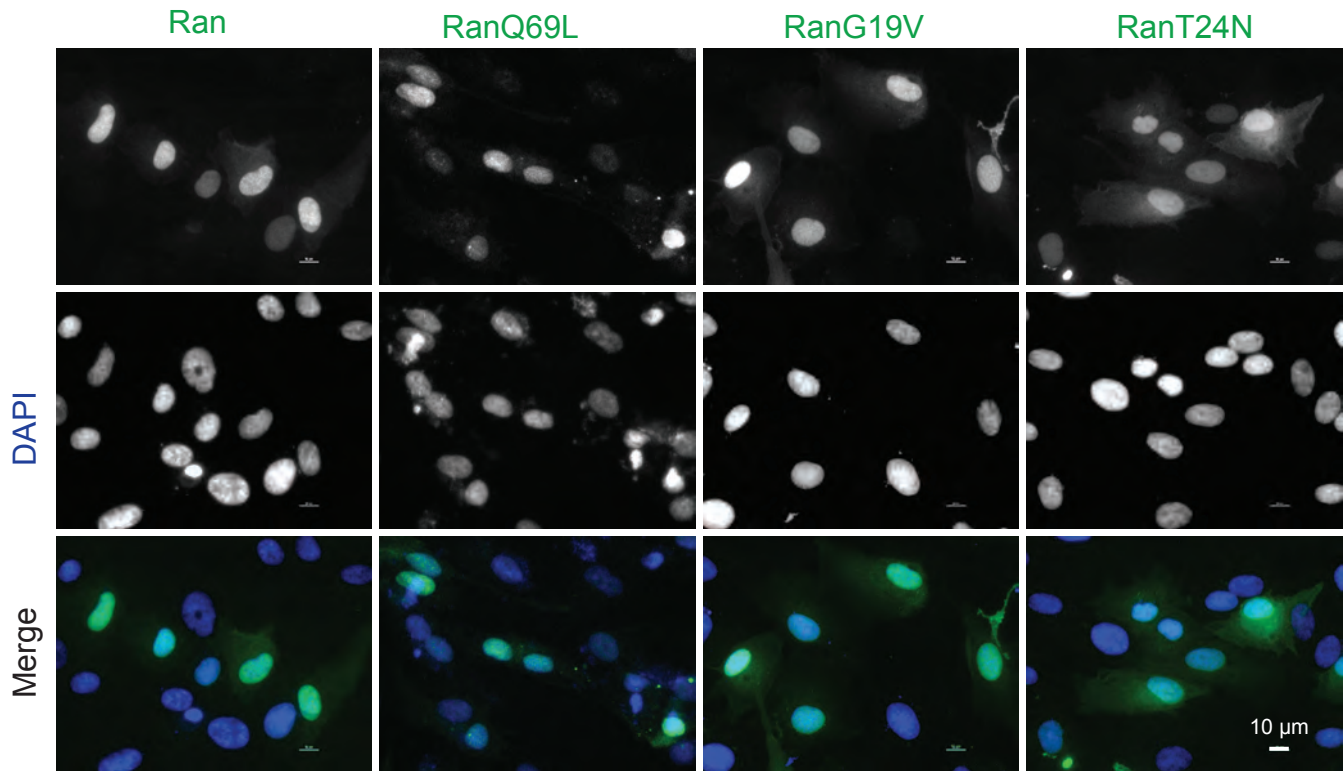

**Figure S2. Subcellular localization of wild-type Ran and its dominant negative mutants in serum starved hTERT-RPE cells**



## Figure S3

```
human Ran  MA----AQGEPQVQFKLVLVGDGGTGKTTFFVKRHLTGEFEKKYVATLGVEVHPLVFHTNR 56
Chlamy Ran1 MALPGQTTPEGVPAFKLVLVGDGGTGKTTFFVKRHITGEFEKKYEPTIGVEVRPLDFTTNR 60
**      : *      *****:***** *:****:* * **

human Ran  GPIKFNVDWTAGQEKFGGLRDGYIQAQCAIIMFDVTSRVTYKNVFNWHRDLVRVCENIP 116
Chlamy Ran1 GKIRFYCWDWTAGQEKFGGLRDGYIHGQCAIIMFDVTSRLTYKNVPTWHRDLRCVCENIP 120
* *:* *****:*****:*****.***** *****

human Ran  IVLCGNKVDIKDRKVKAKSIVFHRKKNLQYYDISAKSNYNFEKPFLLWLRKLIIGDPNLEF 176
Chlamy Ran1 IVLCGNKVDVKNRQVKPKQVTFHRKKNLQYYEISAKSNYNYEKPFLLYLARKLTGDPHLSF 180
*****:*:*:* *.:.*****:*****:*****:***** **:*.*

human Ran  VAMPALAPPEVMDPALAAQYEHDLVAQTALPDEDDDL--- 216
Chlamy Ran1 VEEVALPPPEVQIDLAEQQRNEAELEQAAQQPLPADDDDELDD 223
* ** **** :* * : * :** * ** :***
```

**Figure S3. Sequence alignment of human Ran with *Chlamydomonas* Ran like small GTPase (Ran1).**
